1 **Targeting CSF-1 ameliorates experimental autoimmune encephalomyelitis by depleting inflammatory**  
2 **monocytes and microglia in the central nervous system without affecting quiescent microglia.**

3  
4 Daniel Hwang<sup>1</sup>, Larissa Lumi Watanabe Ishikawa<sup>1</sup>, Alexandra Boehm<sup>1</sup>, Ziver Sahin<sup>1</sup>, Giacomo Casella<sup>1</sup>, Soohwa  
5 Jang<sup>1</sup>, Maryamsadat Seyedsadr<sup>1</sup>, Michael V. Gonzalez<sup>2</sup>, James P. Garifallou<sup>2</sup>, Hakon Hakonarson<sup>2,3</sup>, Guang-  
6 Xian Zhang<sup>1</sup>, Abdolmohamad Rostami<sup>1</sup>, and Bogoljub Ciric<sup>1,\*</sup>

7  
8 <sup>1</sup>Department of Neurology, Jefferson Hospital for Neuroscience, Thomas Jefferson University, Philadelphia, PA.

9 <sup>2</sup>Center for Applied Genomics, The Children's Hospital of Philadelphia, Abramson Research Center,  
10 Philadelphia, PA, 19104.

11 <sup>3</sup>Department of Pediatrics, Perelman School of Medicine, University of Pennsylvania, Philadelphia PA, 19104

12  
13 \*Corresponding author: Bogoljub Ciric, Ph.D., Associate Professor, Department of Neurology, Jefferson Hospital  
14 for Neuroscience, Thomas Jefferson University, 900 Walnut Street, Suite 300, Philadelphia, PA, 19107.

15 [bogoljub.ciric@jefferson.edu](mailto:bogoljub.ciric@jefferson.edu)

16  
17 **Short title:** Blocking CSF-1 ameliorates EAE.

18  
19  
20  
21  
22  
23  
24  
25  
26  
27  
28

## 29 **ABSTRACT**

30 Multiple sclerosis (MS) and its model, experimental autoimmune encephalomyelitis (EAE), are autoimmune  
31 diseases characterized by extensive infiltration of myeloid cells into the central nervous system (CNS). Although  
32 myeloid cells are essential to MS/EAE pathology, none of the current MS therapies specifically target them. A  
33 promising strategy for bridging this gap may be targeting the biological activity of CSF-1R, a receptor tyrosine  
34 kinase important for survival and functioning of certain myeloid cells, such as monocytes and macrophages. It  
35 has been shown that CSF-1R inhibitors suppress EAE, but it is not known whether targeting CSF-1R ligands,  
36 CSF-1 and IL-34, could be a viable therapeutic strategy. We found that neutralization of CSF-1 with Ab  
37 attenuates ongoing EAE, similar to CSF-1R inhibitor BLZ945, whereas neutralization of IL-34 had no effect. Both  
38 anti-CSF-1- and BLZ945-treated mice with EAE had greatly diminished numbers of monocyte-derived dendritic  
39 cells and microglia in the CNS. However, anti-CSF-1 antibody selectively depleted inflammatory microglia,  
40 whereas BLZ945 depleted virtually all microglia, including quiescent microglia. We also found depletion of  
41 myeloid cells in the spleen and lymph nodes of anti-CSF-1- and BLZ945-treated mice, but only a modest  
42 decrease in encephalitogenic T cell responses, suggesting that the depletion of CNS myeloid cells is more  
43 relevant to EAE suppression. Decreased myeloid cell populations in treated mice resulted in reduced production  
44 of IL-1 $\beta$ , a key inflammatory mediator in EAE. The treatments also reduced the frequencies of CCL2- and CCR2-  
45 expressing cells in the CNS, suggesting that CSF-1/CSF-1R inhibition may hinder recruitment of immune cells  
46 to the CNS. Our findings suggest that targeting CSF-1 may be effective in ameliorating myeloid cell-mediated  
47 MS pathology, while preserving homeostatic functions of microglia and decreasing risks that might arise from  
48 their ablation with small molecule inhibitors of CSF-1R.

49  
50  
51  
52  
53  
54  
55  
56

## 57 INTRODUCTION

58 Multiple sclerosis (MS) is an autoimmune disease characterized by accumulation of immune cells in inflamed  
59 areas of the central nervous system (CNS), which form demyelinated regions called MS lesions [2]. Myeloid cells  
60 account for up to 85% of immune cells in active MS lesions [3-5], suggesting that they are the major mediators  
61 of pathology in MS. In support of this notion, studies in an animal model of MS, experimental autoimmune  
62 encephalomyelitis (EAE), have demonstrated the essential role of myeloid cells in EAE pathology, as  
63 interventions that affect them, in particular monocytes and conventional dendritic cells (cDCs), ameliorate or  
64 abrogate EAE [6-8]. However, despite the evidence on the importance of myeloid cells in CNS autoimmunity,  
65 myeloid cells have not thus far been specifically targeted for MS therapy. This provides an opportunity for  
66 devising therapeutic approaches that target myeloid cells relevant to MS pathology.

67  
68 Receptor for colony stimulating factor 1 (CSF-1R) is a cell-surface receptor tyrosine kinase that binds two ligands,  
69 CSF-1 and IL-34 [9]. CSF-1R signaling facilitates survival and proliferation of myeloid cells, with either CSF-1 or  
70 IL-34 predominantly controlling the population size of various myeloid cells in different organs and tissues [9-11].  
71 CSF-1R is expressed on microglia, monocytes and monocyte-derived cells, which comprise the bulk of myeloid  
72 cells in the CNS during MS and EAE [10]. It has been shown that inhibition of CSF-1R signaling with small  
73 molecule inhibitors suppresses EAE pathology [12, 13], but the effects of CSF-1R inhibition on particular myeloid  
74 cell subsets relevant in EAE remain poorly understood. Further, different methods for blocking CSF-1R signaling  
75 in EAE, such as by antibodies (Ab) against the receptor and its individual ligands have not been compared with  
76 small molecule inhibitors. The principal difference between these blocking methods is that small molecule  
77 inhibitors readily penetrate the CNS [1], whereas Abs do not [10, 14], a difference that can lead to distinct  
78 therapeutic outcomes, given that the types and numbers of myeloid cells affected by the inhibition can vary  
79 substantially. In addition, any indirect effects of CSF-1R inhibition on cells that do not express CSF-1R also  
80 remain largely uncharacterized.

81  
82 Our data and other studies show that small molecule inhibitors of CSF-1R cause a profound depletion of  
83 microglia [1, 10], which may be an important drawback in their use for therapy, as microglia play important roles  
84 in CNS homeostasis [15]. It has been shown that neurons can express CSF-1R during excitotoxic injury,

85 contributing to the survival of injured neurons [15]. Notably, it remains unknown whether neurons express CSF-  
86 1R in EAE and MS. Thus, the ideal MS therapy targeting CSF-1R would preferentially affect inflammatory  
87 myeloid cells, while sparing cells with homeostatic functions, such as quiescent microglia. This may be  
88 accomplished by targeting CSF-1R ligands, CSF-1 and IL-34, which show spatial and context- dependent  
89 differences in expression [16]. CSF-1 is systemically the dominant CSF-1R ligand, with its concentrations in the  
90 serum being approximately ten times greater than that of IL-34 [17-23]. Importantly, CSF-1 is not highly  
91 expressed in the CNS, but its expression can be upregulated by inflammation or injury [24], facilitating expansion  
92 of myeloid cells at the site of inflammation. In contrast to more widespread CSF-1 expression, IL-34 is primarily  
93 and constitutively expressed in the CNS and skin [25, 26]. In steady state, IL-34 maintains survival of tissue-  
94 resident myeloid cells in the skin and CNS, as the primary deficiency of IL-34 knockout mice is lack of  
95 Langerhan's cells and microglia, respectively [16]. IL-34 is the predominant CSF-1R ligand in the CNS,  
96 accounting for 70% of total CSF-1R signaling in healthy brain [15].

97  
98 In the present study, we sought to understand how CSF-1R inhibition affects immune cells in the CNS of mice  
99 with EAE, and to determine how the effects of blocking CSF-1 and IL-34 may differ from blockade of CSF-1R.  
100 We found that treatment with CSF-1R inhibitor BLZ945 suppresses EAE when given both prophylactically and  
101 therapeutically. Treatment efficacy correlated with a dramatic reduction in the numbers of monocytes, monocyte-  
102 derived dendritic cells (moDCs), and microglia, suggesting that loss of one or more of these cell types is  
103 responsible for EAE suppression. We also found that Ab-mediated blockade of CSF-1, but not of IL-34,  
104 suppressed EAE. Notably, anti-CSF-1 treatments preferentially depleted inflammatory myeloid cells, whereas  
105 quiescent microglia were preserved. These findings suggest that blockade of CSF-1, rather than of CSF-1R,  
106 may be a preferable therapeutic strategy for alleviating myeloid cell-mediated pathology in MS.

## 113 RESULTS

### 114 **Blocking CSF-1R or CSF-1, but not IL-34, suppresses EAE development.**

115 To determine the role of CSF-1R, CSF-1, and IL-34 in EAE development, we blocked them with either a small-  
116 molecule inhibitor, or neutralizing MAb. We blocked CSF-1R function with BLZ945, a brain-penetrant small-  
117 molecule inhibitor of CSF-1R kinase activity that, among other effects, potently depletes microglia within 5-7  
118 days of treatment [1]. Oral treatment with BLZ945 delayed the onset of EAE for 6-15 days when given  
119 prophylactically (Fig. 1A). BLZ945 initially suppressed disease severity (Fig. 1A), but animals eventually  
120 developed progressively severe disease despite continuous treatment with BLZ945. We also blocked CSF-1R  
121 activity with neutralizing MAb, which was less efficacious than BLZ945 in delaying EAE onset, and only modestly  
122 reduced disease severity (Fig. 1B). Surprisingly, anti-CSF-1R MAb failed to bind to microglia, as determined by  
123 flow cytometry, whereas it bound to monocytes (Supplemental Fig. 1C). Given that microglia express CSF-1R  
124 [27, 28] and are dependent on it for survival [29], it is unclear why AFS98 MAb does not bind to microglia, and  
125 how that may have impacted its effect in EAE.

126 We then tested how blocking either CSF-1 or IL-34 with MAbs would affect EAE. In contrast to blocking CSF-  
127 1R, blocking of CSF-1 did not delay onset of disease (Fig. 1C) but did persistently suppress disease severity  
128 over the course of treatment, including for over 40 days (Fig. 4B). Unlike anti-CSF-1 treatment, anti-IL-34  
129 treatments did not influence either EAE onset or severity (Fig. 1D). We tested whether our treatments with the  
130 MAbs, which were rat IgGs, induced an anti-rat IgG response in treated mice. Anti-CSF1, and control rat IgG2a  
131 isotype MAb induced similar low titers of anti-rat IgG in treated mice, whereas anti-CSF-1R and anti-IL-34 MAbs  
132 induced a notably higher anti-rat IgG response (Supplementary Fig. 1B). This indicates that anti-rat IgG  
133 responses in treated mice could have reduced neutralizing effects of injected MAbs, especially in the case of  
134 anti-CSF-1R and anti-IL-34 MAbs. Even so, this would occur with a delay, as anti-rat IgG Ab titers would build  
135 up gradually.

136 To minimize the development of anti-rat IgG responses against the anti-IL-34 MAb, we treated mice with anti-IL-  
137 34 MAb immediately after the onset of clinical disease; however, this treatment had no impact on disease as  
138 well (Supplemental Fig. 1D). We also tested whether administration of recombinant CSF-1 could exacerbate  
139 EAE pathology, but i.p. injections of CSF-1 did not worsen EAE (Supplementary Fig. 1A). Overall, these data

140 show that blocking CSF-1R signaling attenuates the severity of EAE, and that CSF-1, but not IL-34, is the  
141 relevant CSF-1R ligand in EAE.

### 143 **Prophylactic BLZ945 treatment depletes myeloid antigen-presenting cells in the CNS of mice with EAE.**

144 We characterized how CSF-1R inhibition with BLZ945 influenced CNS inflammation at the peak of EAE. BLZ945-  
145 treated animals had ~90% reduced numbers of CD45<sup>+</sup> cells in the CNS compared to vehicle-treated animals  
146 (Fig. 2A). All major lineages of immune cells were reduced in number, including CD11b<sup>+</sup>, CD11c<sup>+</sup> and CD4<sup>+</sup> cells  
147 (Supplementary Fig. 2A). CD11b<sup>+</sup> cells were most dramatically impacted, including profound depletion of  
148 CD45<sup>Low</sup>CD11b<sup>+</sup>Tmem119<sup>+</sup>CX3CR1<sup>Hi</sup> microglia (Supplementary Fig. 2E, F), as reported for BLZ945 treatment  
149 [1]. Amongst CD45<sup>Hi</sup> cells, there was significant reduction in the frequency of CD11b<sup>+</sup>CD11c<sup>+</sup> myeloid DCs  
150 (Supplementary Fig. 2B). Myeloid DCs in the CNS of mice with EAE primarily comprise moDCs, and indeed  
151 CD45<sup>Hi</sup> CD11b<sup>+</sup> CD11c<sup>+</sup> Ly6G<sup>Low/+</sup>Ly6C<sup>Hi</sup> MHC II<sup>Hi</sup> moDCs were nearly absent from the CNS of BLZ945-treated  
152 mice (Supplementary Fig. C,D). We also found several differences in cytokine production by CD4<sup>+</sup> T cells from  
153 BLZ945-treated mice, including higher frequencies of IL-10<sup>+</sup> and TNF<sup>+</sup> cells, and lower frequency of GM-CSF<sup>+</sup>  
154 cells (Supplementary Fig. 2G).

156 To comprehensively define how CSF-1R inhibition influences the overall composition of immune cells in the CNS  
157 during EAE, we analyzed flow cytometry data by *t*-stochastic neighbor embedding (*t*-SNE). Consistent with  
158 manual gating, the frequency of microglia and moDCs/macrophages was dramatically reduced (Fig. 2B-F). In  
159 contrast, the frequency of neutrophils was increased; likely reflecting that they do not express CSF-1R [30], and  
160 are therefore not impacted by CSF-1R inhibition. Interestingly, the frequency of undifferentiated monocytes  
161 (CD45<sup>Hi</sup>CD11b<sup>+</sup>Ly6C<sup>Hi</sup>CD11c<sup>-</sup>MHCII<sup>-</sup>) increased, suggesting that CSF-1R may impact monocyte differentiation.  
162 Overall, BLZ945 treatment markedly reduced the frequency of CD11c<sup>+</sup> myeloid antigen-presenting cells (APCs)  
163 expressing MHC class II, CD80 and CD86 (Fig. 2E,F), suggesting that CSF-1R signaling maintains sufficient  
164 numbers of APCs in the CNS to drive inflammation during EAE.

168 **BLZ945 suppresses EAE when given therapeutically, reducing the number of myeloid APCs in the CNS.**

169 We next tested whether BLZ945 could suppress EAE after clinical disease has developed, as that scenario is  
170 the most relevant to MS therapies. Therapeutic treatments with BLZ945 rapidly suppressed clinical EAE in a  
171 dose-dependent manner, with 300 mg/kg/day dose being the most efficacious (Fig 3A-B). To determine the acute  
172 effects of CSF-1R inhibition on immune cells in the CNS, we focused our analysis on mice treated with BLZ945  
173 for 6 days, starting at a clinical score of 2.0. Compared to control mice, BLZ945-treated mice had reduced  
174 numbers of CD45<sup>+</sup> cells in the CNS (Fig. 3C), primarily due to fewer CD11b<sup>+</sup> and CD11c<sup>+</sup> cells, whereas the  
175 numbers of CD4<sup>+</sup> cells were mostly unaffected (Fig. 3D). Fewer numbers of CD11b<sup>+</sup> cells reflect depletion of  
176 microglia and reduction in numbers of CD11b<sup>+</sup>CD11c<sup>+</sup> cells among infiltrating CD45<sup>Hi</sup> cells (Fig. 3E). In contrast,  
177 CD11b<sup>+</sup>CD11c<sup>-</sup> cells were not affected by BLZ945 treatment (Fig. 3F). Most immune cells depleted by BLZ945  
178 treatment co-expressed CD11c, TNF, MHC II, CD80, and CD86, suggesting that inflammatory APCs are  
179 preferentially affected by CSF-1R inhibition (Fig. 3G-I). Taken together, these data further indicate that inhibition  
180 of CSF-1R signaling reduces the pool of APCs in the CNS during EAE. Moreover, this bolsters the notion that  
181 targeting CSF-1R signaling is therapeutically efficacious in EAE, by reducing myeloid cell-dependent  
182 inflammation.

183

184 **Blockade of CSF-1 with MAb depletes inflammatory myeloid APCs in the CNS during EAE, but does not**  
185 **affect quiescent microglia.**

186 We next tested the therapeutic efficacy of anti-CSF-1 MAb treatment. The treatment initiated after onset of  
187 disease suppressed clinical EAE (Fig. 4A) and the suppression was maintained up to 45 days after EAE  
188 induction, which was the longest period tested (Fig. 4B). Similar to BLZ945, anti-CSF-1 MAb suppressed disease  
189 even when treatments were initiated during its more advanced stage (Fig. 4C, D). Mice treated with anti-CSF-1  
190 MAb had fewer immune cells in the CNS, including CD11b<sup>+</sup>, CD11c<sup>+</sup>, and CD4<sup>+</sup> cells (Fig. 4E, F). The treatments  
191 significantly decreased frequency of CD11b<sup>+</sup>CD11c<sup>+</sup> myeloid DCs in the CNS (Supplementary Fig. 3A) and  
192 among CD11b<sup>+</sup> myeloid cells, we observed reduced frequencies of CD11c<sup>+</sup> microglia, moDCs, cDCs and other  
193 CD11c<sup>+</sup> cells, indicating that DC populations were preferentially affected (Supplementary Fig. 3B). Of relevance  
194 to therapy, anti-CSF-1 MAb treatments reduced the numbers of microglia to those in naïve mice (Fig. 4G), without  
195 depleting almost entire microglia, as BLZ945 does. This suggests that CSF-1 promotes the expansion of

196 activated microglia in response to inflammation. Consistent with this hypothesis, the reductions in microglia  
197 numbers in anti-CSF-1-treated mice were primarily due to loss of activated microglia, which expressed MHC II  
198 and/or CD68 (Fig. 4H).

199  
200 We then quantified how anti-CSF-1 MAb treatments affected the composition of myeloid cells in the inflamed  
201 CNS by analyzing CD45<sup>+</sup>CD11b<sup>+</sup> cells from isotype- and anti-CSF-1-treated animals by *t*-SNE (Fig. 4I,J). Anti-  
202 CSF-1 treatments reduced the frequencies of moDCs, macrophages, activated microglia and undifferentiated  
203 monocytes, but did not affect the frequency of neutrophils. This resulted in a large increase in the frequency of  
204 quiescent microglia among CD11b<sup>+</sup> cells. Similar to BLZ945-treated mice, anti-CSF-1 MAb treatment resulted in  
205 MFI decrease for MHC II and CD80, but not CD86 (Fig. 4K), suggesting that inflammatory APCs were impacted  
206 by anti-CSF-1 MAb treatments. Consistent with this, anti-CSF-1-treated mice had a lower frequency of TNF<sup>+</sup>MHC  
207 II<sup>+</sup> cells in their CNS (Supplementary Fig. 3C). As in BLZ945-treated animals, numbers of moDCs were  
208 dramatically reduced by anti-CSF-1 treatment (Supplementary Fig. 3D). An important pathogenic function of  
209 moDCs in EAE is production of IL-1 $\beta$  [31]. As expected, a reduced frequency of IL-1 $\beta$ -producing cells was also  
210 observed in the CNS of anti-CSF-1 treated EAE mice (Fig. 4L). Together, these data suggest that blockade of  
211 CSF-1 preferentially depletes infiltrating and resident inflammatory myeloid cells, without affecting the  
212 homeostatic pool of microglia.

### 213 214 **CSF-1R inhibition depletes myeloid DCs and monocytes in peripheral lymphoid compartments.**

215 Treatment with BLZ945 delayed onset of disease, while anti-CSF-1 treatment did not. This difference could be  
216 due to diminished priming of encephalitogenic T cell responses in peripheral lymphoid organs of BLZ945-treated  
217 mice, resulting in failure to initiate disease in the CNS. To test this possibility, we treated immunized mice with  
218 either BLZ945 or anti-CSF-1 MAb and sacrificed them during the priming phase of EAE on day 8 p.i. We  
219 quantified the immune cells in blood, draining lymph nodes (dLN) and spleen, and found no difference in overall  
220 numbers of CD45<sup>+</sup> cells in any tissues examined from BLZ945- or anti-CSF-1-treated mice compared to control  
221 animals (Supplementary Fig. 4). We did, however, observe a decrease in the numbers of CD11b<sup>+</sup> cells in all  
222 tissues examined from BLZ945-treated mice, but not from anti-CSF-1-treated mice (Supplementary Fig. 4A-C).  
223 Further examination of CD11b<sup>+</sup> cells revealed fewer CD11b<sup>+</sup>CD11c<sup>+</sup> cells in the spleen, blood and dLN from



224 BLZ945-treated mice (Fig. 5A-C), and in the spleen and blood of anti-CSF-1-treated mice (Fig. 5D-F). Similarly,  
225 there was a decrease in moDCs in most secondary lymphoid organs from both BLZ945- and anti-CSF-1-treated  
226 mice (Fig. 5A-F). Notably, numbers of monocytes were reduced in all examined tissues from BLZ945-treated  
227 mice, but not from anti-CSF-1-treated mice (Fig. 5). We tested whether reductions in myeloid DCs in the spleen  
228 and dLNs would diminish MOG<sub>35-55</sub>-specific T cells responses, but did not find reduced proliferation of cells from  
229 either BLZ945- or anti-CSF-1-treated animals when compared to control animals (Fig. 5G,H). We also measured  
230 antigen-specific proliferation at day 16 p.i. and found a reduction in proliferation of splenocytes from BLZ945-  
231 treated mice, but not of cells from dLNs (Fig. 5I,J). The reduction was likely due to fewer APCs, rather than  
232 intrinsic differences in APC function, as co-culture of equal numbers of CD11c<sup>+</sup> cells purified from spleens of  
233 vehicle- or BLZ945-treated mice with CD4<sup>+</sup> T cells from 2D2 mice elicited similar levels of proliferation. These  
234 data show that myeloid DCs are impacted by CSF-1R inhibition, but this only modestly affected the development  
235 of myelin antigen-specific responses. Thus, delayed onset of disease in BLZ945-treated animals is likely due to  
236 factors other than impaired development of MOG<sub>35-55</sub>-specific T cells responses.

237

### 238 **CSF-1R signaling promotes survival/proliferation of BM-derived moDCs but not their APC function.**

239 We sought to understand how CSF-1R signaling influences the numbers of DCs using BMDC cultures, generated  
240 in the presence of GM-CSF and neutralizing anti-CSF-1 and anti-CSF-1R MAbs. It has been shown that there is  
241 a large expansion of monocyte precursors in these cultures and that resulting DCs are predominantly monocyte-  
242 derived [32]. We found that cultures with either anti-CSF-1 or anti-CSF-1R MAbs contained fewer CD11c<sup>+</sup>MHCII<sup>Hi</sup>  
243 DCs (Fig. 6A). This was coincidental with a decreased ratio of live/dead cells after LPS treatment (Fig. 6B),  
244 suggesting that survival of BMDCs was negatively impacted by the absence of CSF-1R signaling. We also tested  
245 whether CSF-1R signaling was important for development of APC function in BMDCs. We observed only a small  
246 reduction in the frequency of CD11c<sup>+</sup>MHCII<sup>+</sup> among live CD11b<sup>+</sup> cells (Fig. 6C,D), suggesting that CSF-1R  
247 inhibition affects numbers of BMDCs, rather than their ability to differentiate in the presence of GM-CSF and IL-  
248 4. To test this hypothesis, we then determined whether CSF-1R inhibition influences APC function of BMDCs by  
249 co-culturing them with 2D2 CD4<sup>+</sup> T cells. Blocking CSF-1R signaling, either during differentiation/maturation of  
250 BMDCs, or during the co-culturing, did not affect the proliferation of 2D2 T cells (Fig. 6E). To confirm that these  
251 findings are applicable to monocyte-derived BMDCs, we purified CD11b<sup>+</sup>Ly6G<sup>-</sup>Ly6C<sup>Hi</sup> monocytes from the BM

of CD45.1<sup>+</sup> mice, mixed them with total BM cells from CD45.2<sup>+</sup> mice and then blocked CSF-1R signaling during their development into BMDCs. Consistent with total BM cultures, blockade of CSF-1R signaling did not affect the frequency of CD11c<sup>+</sup>MHCII<sup>hi</sup>CD45.1<sup>+</sup> monocyte-derived cells (Fig. 6F,G), but it caused a ~75% reduction in their numbers when compared to control IgG-treated cultures (Fig. 6H). Together, these data indicate that CSF-1R signaling promotes the survival of moDCs, rather than promoting their differentiation and APC function, which is consistent with the role of CSF-1R signaling in maintaining myeloid cell populations [9-11].

### **Blocking CSF-1R signaling or CSF-1 reduces numbers of CCL2-producing and CCR2-expressing myeloid cells in the CNS during EAE.**

We observed that numbers of monocytes/moDCs were greatly reduced in the CNS of mice with EAE during CSF-1R inhibition. Given that monocyte recruitment into the CNS via CCL2/CCR2 signaling is essential to EAE pathology [33, 34], and that several reports have shown that CSF-1 induces CCL2 production by monocytes [35-37], we examined CCL2 production in the CNS of BLZ945- and anti-CSF-1-treated mice with EAE. The vast majority of CCL2<sup>+</sup> cells were CD45<sup>+</sup> (Supplementary Fig. 5A). Among CD45<sup>+</sup> cells, there was a reduction in numbers of CCL2<sup>+</sup> cells in both BLZ945- and anti-CSF-1-treated animals (Fig. 7A, D). The majority of CCL2<sup>+</sup> cells was CD11b<sup>+</sup>Ly6C<sup>+</sup> (Fig 7B,C,E,F), indicating that monocyte-derived cells are a relevant source of CCL2 in the CNS during EAE. Most CCL2<sup>+</sup> cells were TNF<sup>+</sup>MHC II<sup>+</sup> inflammatory myeloid cells (Supplementary Fig. 5B,C,F,G). Notably, MFI for CCL2 among CCL2<sup>+</sup> cells from anti-CSF-1-treated mice but not from BLZ945-treated mice was also reduced (Supplementary Fig. 5E).

We also examined CCR2<sup>+</sup> cells from the CNS of BLZ945- and anti-CSF-1-treated mice. As with CCL2-producing cells, there was a reduction in numbers of CCR2<sup>+</sup> cells (Fig. 7G,J). Most CCR2<sup>+</sup> cells were CD45<sup>hi</sup>CD11b<sup>+</sup>Ly6C<sup>+</sup> cells (Fig. 7H,I,K,L), indicating that these were the same cells that produce CCL2. Indeed, nearly all CCL2<sup>+</sup> cells were CCR2<sup>+</sup>CD11b<sup>+</sup> cells in anti-CSF-1-treated mice (Supplementary Fig. 5K). Combined with our *in vitro* findings, these data suggest that antagonism of CSF-1R signaling inhibits the survival and proliferation of monocytes/moDCs, resulting in fewer CCL2-producing cells, which then reduces the recruitment of CCR2<sup>+</sup> cells in the CNS during EAE.

280 **Monocytes remaining in the CNS of anti-CSF-1-treated mice have a transcriptional profile consistent with**  
281 **a pro-survival phenotype.**

282 Anti-CSF-1 MAb treatments depleted most (>80% depletion) but not all monocytes and monocyte-derived cells  
283 in the CNS of mice with EAE (Fig. 8A,B). To identify transcriptional changes that could have enabled some  
284 monocytes to persist despite diminished CSF-1 signaling, we sequenced their transcriptome after 6 days of  
285 treatment, a timepoint that correlated well with maximal disease suppression (gating strategy shown in  
286 Supplementary Fig. 6A). There were 412 genes differentially expressed between monocytes from anti-CSF-1-  
287 and control MAb-treated mice (Fig. 8C,D). We utilized the DAVID bioinformatics database [38, 39] to identify  
288 gene ontology, and KEGG pathway terms that were significantly enriched among the differentially expressed  
289 genes. Among GO terms identified as significantly enriched, the largest percentage of genes were involved in  
290 cell division (Fig. 8E and Supplementary Fig. 6B). Among enriched KEGG pathways in these monocytes, the  
291 module with the greatest number of genes was the PI3K-Akt signaling pathway (Fig. 8F and Supplementary Fig.  
292 6C), which controls proliferation [40]. Among genes in this pathway, a number of growth factor receptors and  
293 transcription factors were upregulated, including VEGFR, myb, Kit, Pdgfrb, and Fgfr1 (Fig. 8G). These data  
294 suggest that monocytes in the CNS of anti-CSF-1-treated mice survive by upregulation of alternative growth  
295 factor receptors, which compensate for diminished CSF-1R signaling.

## DISCUSSION

We show that blocking CSF-1R, CSF-1 and IL-34 has differential effects on EAE. Overall, inhibition of CSF-1R signaling by blocking either CSF-1R or CSF-1 resulted in suppression of clinical disease and diminished numbers of inflammatory myeloid cells in the CNS. Numbers of microglia and monocyte-derived cells were reduced by CSF-1R inhibition. Notably, blocking CSF-1R or CSF-1 produced distinct effects on the composition of immune cells in the CNS during EAE. Treatment with BLZ945 depleted almost all microglia, whereas anti-CSF-1 MAb treatment preferentially depleted inflammatory microglia, reducing their number to similar levels as in naïve mice. This limited depletion of microglia by anti-CSF-1 MAb could be advantageous in MS therapy, as it carries fewer potential risks than widespread microglia depletion likely would. Of importance for MS therapy, notably lower microglia depletion by anti-CSF-1 MAb than with BLZ945 did not result in an inferior disease suppression, but rather improved long-term therapeutic efficacy when compared to BLZ945 treatments, suggesting that full therapeutic benefit can be achieved without applying a maximally ablative approach.

The limited microglia depletion by anti-CSF-1 MAb is likely due to the presence of IL-34 in non-inflamed CNS areas, where it maintains homeostatic microglia survival. Indeed, it has been shown that systemic anti-CSF-1 MAb injections do not deplete microglia [41], which is consistent with studies showing that IL-34 accounts for approximately 70% of CSF-1R signaling in healthy brain [15]. Moreover, anti-CSF-1 MAb are unlikely to penetrate extensively into the CNS parenchyma, as only a miniscule fraction of Abs cross the intact blood-brain barrier [10, 14]. Thus, it is expected that neutralization of CSF-1 in the CNS occurs primarily in active lesions, resulting in localized depletion of inflammatory myeloid cells. This model is analogous to the role of CSF-1R ligands in the skin, where IL-34 maintains Langerhans cells in steady state. However, during skin inflammation IL-34 becomes dispensable, as infiltrated immune cells produce CSF-1 and maintain/expand numbers of Langerhans cells [25]. It should be noted, however, that CSF-1R signaling is not in itself inherently pro-inflammatory by eliciting inflammatory phenotype of myeloid cells, but can have such a net effect by simply maintaining their survival during inflammation. In fact, in the absence of inflammation, CSF-1R signaling induces a suppressive M2 phenotype in macrophages and a resting/quiescent phenotype in microglia [1, 15, 19, 42-54]. Hence, our observations on blockade of CSF-1R signaling in EAE are the net effect of abrogating both pro- and anti-inflammatory functions of CSF-1R signaling, with the pro-inflammatory ones predominating. Together, our

336 findings suggest that CSF-1 promotes inflammation in EAE by expansion of microglia and monocyte-derived  
337 myeloid cells, whereas IL-34 maintains microglia in non-inflamed CNS areas, similar to the healthy CNS.

338  
339 Our data suggest that IL-34 does not play a significant role in EAE. This can be explained by notably more  
340 widespread and abundant expression of CSF-1 compared with IL-34 [55]. In most cases CSF-1 can therefore  
341 compensate for lack of IL-34. This interpretation is supported by the striking differences in phenotypes of CSF-  
342 1 and IL-34 knockout mice, with CSF-1 knockout mice having numerous severe defects, whereas IL-34 knockout  
343 mice have mild phenotype [16]. Observations that CSF-1 is present in serum in surprisingly high concentrations  
344 (~500-1000 pg/ml) [17-20], which is approximately 10 times higher than IL-34 (~50-100 pg/ml) [21-23], further  
345 support the view that CSF-1 is more plentiful than IL-34 and is therefore more impactful. Moreover, a study has  
346 demonstrated that CSF-1 in inflamed sites becomes the dominant CSF-1R ligand, even in tissue (skin) where  
347 IL-34, but not CSF-1, is expressed in steady state [25]. Thus, although our data suggest that blockade of IL-34  
348 with rat MAb may have been incomplete due to the development of anti-rat IgG responses, it is probable that  
349 abundantly produced CSF-1 in CNS lesions mediates most CSF-1R signaling, and that blockade of IL-34  
350 therefore does not have any effect on EAE.

351  
352 Our in vitro studies with BMDCs and moDCs show that the primary effect of CSF-1R inhibition is limiting the  
353 number of myeloid DCs in these cultures rather than affecting their APC functions. These data are consistent  
354 with a body of literature showing that CSF-1R signaling in myeloid cells chiefly provides proliferative and anti-  
355 apoptotic signals for maintenance of the population size as regulated by ligand availability [56]. This concept is  
356 exemplified by differences between animals lacking CSF-1 and IL-34, in which CSF-1 knockout mice have  
357 reduced numbers of osteoclasts and monocytes but only a modest reduction in microglia [16]. In contrast, IL-34  
358 knockout mice have greatly reduced numbers of microglia and Langerhans cells, but largely normal numbers of  
359 other tissue resident macrophages [16]. Thus, CSF-1R inhibition is likely to suppress inflammation in EAE by  
360 reducing the population size of inflammatory myeloid cells in the CNS.

361  
362 Transcriptional profiling of the remaining monocytes from the CNS of mice treated with anti-CSF-1 MAb suggests  
363 that they avoid death from lack of CSF-1R signaling via upregulation of other growth factor receptors known to

364 promote myeloid cell survival, including Kit [57-59]. Notably, upregulation of these genes has been reported in  
365 myeloid cell cancers [60-64]. However, a number of questions regarding these surviving monocytes remain, such  
366 as: are they a normally present subpopulation among CNS monocytes, or they are induced by blockade of CSF-  
367 1; do they eventually succumb to early death compared to those monocytes that have been receiving CSF-1R  
368 signaling; do all monocytes lacking CSF-1R signaling temporarily acquire this phenotype before death; and, what  
369 is the capacity of the surviving monocytes to perpetuate inflammation? It is possible that altered phenotype of  
370 surviving monocytes is less pro-inflammatory because of diminished effector functions, such as cytokine and  
371 chemokine production.

372  
373 Our in vivo studies indicate an additional mechanism of EAE suppression by inhibition of CSF-1R signaling,  
374 namely reduced recruitment of cells to the CNS. We found reduction in numbers of both CCL2- and CCR2-  
375 expressing cells when mice with EAE were treated with BLZ945 or anti-CSF-1. Most cells that expressed CCL2  
376 and CCR2 were monocytes/moDCs, which suggests a model whereby monocytes that infiltrate the CNS produce  
377 CCL2, thus amplifying inflammation by further recruitment of CCR2-expressing cells. Given that CSF-1R  
378 signaling in monocytes/macrophages induces CCL2 expression [35-37], this suggests that its blockade reduces  
379 CNS inflammation by two mechanisms: 1) by reducing numbers of cells that produce CCL2, and 2) by reducing  
380 CCL2 production of surviving cells, which together amounts to greatly diminished CCL2 levels in the CNS during  
381 EAE. This is consistent with an essential role of CCL2 and CCR2 in EAE, since interventions that affect them  
382 attenuate disease [65-67]. It is also possible that in addition to monocytes, reduced CCL2 directly affects  
383 recruitment of CCR2<sup>+</sup> Th cells to the CNS, given a report that CCR2 drives their recruitment to the CNS [65].  
384 Together with our result showing reduced GM-CSF and IL-1 $\beta$  production in the CNS, it is likely that CSF-1R  
385 inhibition suppresses EAE by depleting CCL2- and IL-1 $\beta$ -expressing APCs; IL-1 $\beta$  has an essential role in EAE  
386 [6, 31, 68, 69] by acting on CD4<sup>+</sup> T cells to promote their proliferation and GM-CSF production; GM-CSF is also  
387 essential to EAE development by acting on monocytes to induce their pro-inflammatory phenotype and IL-1 $\beta$   
388 production, thus completing a positive feedback loop that sustains inflammation in EAE [70]. Inhibiting CSF-1R  
389 signaling would therefore interrupt this pro-inflammatory feedback loop, resulting in the sustained EAE  
390 suppression we observed upon treatment with BLZ945 and anti-CSF-1 MAb.

392 MAb therapies against CSF-1 and small molecule inhibitors of CSF-1R have been tested in multiple clinical trials  
393 and disease contexts, including autoimmune and oncological settings [71-76]. These trials have demonstrated  
394 that blockade of CSF-1/CSF-1R is well tolerated by patients [75, 77, 78]. Targeting CSF-1/CSF-1R in MS has  
395 not been tested, but agents used in preexisting trials would likely be suitable for testing in MS. Moreover, because  
396 CSF-1R signaling is not required by myeloid progenitors residing in the BM or CNS (for microglia) [29, 56], the  
397 effects of these treatments would be reversible. Indeed, there is complete repopulation of microglia within one  
398 week after cessation of treatment with CSF-1R inhibitors [29]. A treatment modality can be envisioned whereby  
399 blocking CSF-1R signaling for therapy of MS would follow an intermittent regimen, given for a period of time,  
400 instead of as a continuous treatment. Thus, as a potential therapy that depletes pathogenic myeloid cells in MS,  
401 targeting CSF-1/CSF-1R offers several potential advantages, including the potential of being readily translatable  
402 to clinical testing.

403  
404 In conclusion, our findings show that blocking CSF-1R signaling dramatically decreases EAE severity by  
405 reducing number of inflammatory APCs in the CNS. Anti-CSF-1 MAb treatments have an advantage over  
406 BLZ945 treatments, and likely other small molecule inhibitors of CSF-1R function, in that they preferentially  
407 deplete inflammatory microglia, while sparing quiescent microglia and their homeostatic functions. This limited  
408 depletion, however, does not diminish the therapeutic effect of anti-CSF1 MAb treatment compared to BLZ945  
409 treatment. Reducing CSF-1R signaling via neutralization of CSF-1 seems, therefore, to be a promising  
410 therapeutic strategy for MS therapy.

411  
412  
413  
414  
415  
416  
417  
418  
419

## 420 **MATERIALS AND METHODS**

### 421 **Mice**

422 All mice used in this study were on C57BL/6J genetic background. Mice were either obtained from The Jackson  
423 Laboratories (Bar Harbor, Maine) or bred in-house. All experimental procedures were approved by the  
424 Institutional Animal Care and Use Committee of Thomas Jefferson University.

### 426 **Flow Cytometry**

427 Isolated cells were stimulated with PMA (500 ng/mL; Sigma Aldrich), ionomycin (50 ng/mL; Sigma Aldrich), and  
428 1  $\mu$ L/mL Golgiplug (BD Biosciences) for 4 h at 37°C. After stimulation, cells were washed with PBS containing  
429 3% FBS (v/v). Cell surface antigens were stained with Abs in 100  $\mu$ L of PBS/3% FBS for 20-30 min at 4°C. Cells  
430 were then washed and fixed with 100  $\mu$ L Fix and Perm Medium A (Thermo Fisher) for 20 min at room temperature  
431 and washed again. Cells were permeabilized with Fix and Perm Medium B (Thermo Fisher) and stained with  
432 Abs against intracellular antigens in 100  $\mu$ L Fix and Perm Medium B and 100  $\mu$ L PBS/3%FBS for 1 h. Cells were  
433 then washed twice, resuspended in 500  $\mu$ L PBS and analyzed on a BD FACSAria Fusion flow cytometer (BD  
434 Biosciences).

### 436 **Induction and Scoring of EAE**

437 EAE was induced by immunization with 1:1 emulsion of PBS and complete Freund's adjuvant (CFA) containing  
438 5 mg/mL heat killed *M. tuberculosis* (BD Biosciences) and 1 mg/mL MOG<sub>35-55</sub> peptide (Genscript). Mice were  
439 immunized on the both flanks by subcutaneous injection of the emulsion for a total of 200  $\mu$ L. Pertussis toxin  
440 was i.p. injected on days 0 and 2 post-immunization at 200 ng per dose. Mice were scored according to the  
441 following scale: 0 - No clinical symptoms. 0.5 - Partial paralysis of the tail or waddling gait. 1.0 - Full paralysis of  
442 the tail. 1.5 - Full paralysis of the tail and waddling gait. 2.0 - Partial paralysis in one leg. 2.5 - Partial paralysis  
443 in both legs or one leg paralyzed. 3.0 - Both legs paralyzed. 3.5 - Ascending paralysis. 4.0 - Paralysis above the  
444 hips. 4.5 – Moribund; mouse being unable to right itself for 30 seconds. 5.0 - Death.



## 448 **Isolation of Immune Cells from the CNS**

449 Mice were anesthetized and blood was removed by perfusion with 60 mL PBS. Spinal cord was flushed out of  
450 the spinal column with PBS. Brains and spinal cords were pooled and cut manually into small pieces in 700  $\mu$ L  
451 Liberase TL dissolved in RPMI at 0.7 mg/mL (Roche) then incubated at 37°C for 30 min before reaction was  
452 quenched using complete media containing FBS. Tissue was homogenized by pushing through a 100  $\mu$ m sterile  
453 filter with syringe plunger. Homogenate was centrifuged at 1500 RPM (300 x g) for 5 min and resuspended in  
454 25 mL of 70% 1x Percoll-PBS (90% Percoll, 10% 10x PBS). 25 mL of 30% Percoll-PBS was gently overlaid  
455 onto the 70% layer and was centrifuged at 2000 RPM without brake at room temperature for 30 min. Cells that  
456 pooled at the interface of 30/70% layers and the majority of the 30% layer were then collected, diluted with PBS  
457 or media and centrifuged at 1500 RPM (300 x g) for 5 min.

## 458 459 460 **Antibody Titer Measurement**

461 Serum was collected from peripheral blood of animals treated with Rat IgG<sub>2A</sub> (Clone: 2A3; Bio X Cell), anti-CSF1  
462 MAb (Clone: 5A1; Bio X Cell), anti-CSF-1R MAb (Clone: AFS98; Bio X Cell), anti-IL-34 MAb (Clone: 780310,  
463 Novus Biologicals). 96-well ELISA plates were coated with the same MAb that was used to treat animals  
464 overnight at room temperature and blocked with 1% BSA for 2 h. Plates were washed and incubated with serum  
465 for 1 h and washed. Anti-Mouse IgG-HRP conjugate secondary Ab (Jackson Immunolabs) was used to detect  
466 the presence of anti-Rat IgG response by measuring absorbance at 450 nm and subtracting absorbance at 540  
467 nm.

## 468 469 **BLZ945 Preparation and Treatment**

470 BLZ945 (Selleck Chemicals and MedChemExpress) was prepared from powder in 20% captisol at 12 mg/mL.  
471 Mice were treated with BLZ945 by oral gavage with 4-6 mg/treatment/day. In initial experiments, we used BLZ945  
472 prepared in 20% captisol, and 20% captisol as control, which were a generous gift from Novartis International  
473 AG.

474  
475

## ***In vivo* CSF-1, Anti-CSF-1, Anti-IL-34, and Anti-CSF-1R Treatments**

Recombinant CSF-1 (4 µg/dose; R&D Systems) was given to EAE mice on days 4, 8, 12, 16 post immunization (p.i.) by intraperitoneal (i.p.) injection. All MAb treatments were also given by i.p. injection. Prophylactic treatments with anti-CSF-1 (200 µg/dose; clone: 5A1; Bio X Cell) started on day 0 p.i. and were given every other day until disease onset when dosing was changed to every day. In therapeutic treatments, MAb was given every day, starting on days indicated in figures, for the duration of acute phase of the disease (typically days 11-25 p.i.), then switched to every other day for the rest of the experiments. Equal amounts of control IgG1 (Clone: HPRN; Bio X Cell) were used to treat control mice. Mice were treated with anti-IL-34 MAb (100 µg/dose; Clone: 780310; Novus Biologicals) every other day for the duration of the experiment. Anti-CSF-1R Mab (400 µg/dose; Clone: AFS98; Bio X Cell) was given every other day. In experiments with anti-IL-34 and anti-CSF-1R MAbs, equal amounts of control IgG2A (Clone: 2A3; Bio X Cell) were given to control mice.

## **Bone Marrow-Derived DC Culture**

Bone marrow (BM) was isolated from tibia and femurs of mice and BM cells were cultured at  $1 \times 10^6$  cells per mL in a total volume of 10 mL in petri dishes with GM-CSF (20 ng/mL) + IL-4 (20 ng/mL) for 4 days. On the 4<sup>th</sup> day, 5 mL of media was removed from the plates, cells were pelleted by centrifugation and resuspended in 5 mL fresh media containing GM-CSF and IL-4. The cell suspension was added back to the original petri dishes and cultured for an additional 3 days. To induce a mature DC phenotype, cells were washed, replated in fresh media containing LPS (300 ng/mL) and cultured for 72 h. For cultures involving monocytes, CD11b<sup>+</sup> cells were isolated from BM cell suspension of CD45.1<sup>+</sup> mice by MACS positive selection (Miltenyi Biotec) and then Ly6C<sup>Hi</sup>Ly6G<sup>-</sup> monocytes were sorted on a FACSAria Fusion instrument (BD Biosciences). Isolated monocytes were then added to CD45.2<sup>+</sup> total BM cell cultures.

## **Co-culture of DCs and T cells and Proliferation Assay**

For proliferation assays,  $4 \times 10^4$  DCs were co-cultured with  $1.6 \times 10^5$  2D2 CD4<sup>+</sup> T cells in 96-well U-bottom tissue culture plates. Cells were stimulated with MOG<sub>35-55</sub> peptide (25 µg/mL) for 72 h. At approximately 60 h after starting the culture, 1 µCi of [<sup>3</sup>H]Thymidine (Perkin-Elmer) was added to each well in a volume of 50 µL. Cells were harvested 24 h later and counts per minute (C.P.M.) measured in MicroBeta2 beta counter (Perkin-Elmer).

## 504 **Library Preparation and RNA-seq Analyses**

505 Next-generation sequencing libraries were prepared using the Illumina TruSeq Stranded Total RNA library  
506 preparation kit, with high quality RNA (RIN  $\geq$  8.7) and 200 ng of input RNA. Libraries were assessed for quality  
507 using the PerkinElmer Labchip GX and qPCR using the Kapa Library Quantification Kit and the Life Technologies  
508 Vii7 Real-time PCR instrument. Libraries were diluted to 2 nM and sequenced in a paired-end (2 x 100bp),  
509 dual-indexed format on the Illumina HiSeq2500 using the High Output v4 chemistry.

510 RNA-seq reads were demultiplexed into sample-specific fastq files and aligned to the mm10 reference genome  
511 using the DRAGEN genome pipeline [79] to produce BAM files. Generated BAM files were read into R statistical  
512 computing environment and gene counts were obtained using the Rsubread package, producing a feature/gene  
513 counts matrix. Differential expression analysis was performed using the R/Bioconductor package DESeq2 which  
514 uses a negative binomial model [80]. Analysis was performed using standard thresholds and parameters while  
515 filtering genes with low mean normalized counts. Further downstream analysis was performed using the  
516 Ingenuity Pathway Analysis (IPA) and GSEA software using the normalized read count table. Additionally,  
517 differentially expressed genes ( $p < 0.01$ ) were entered into the DAVID utility for functional annotation and analyzed  
518 for gene ontology terms for biological processes and for KEGG pathway terms [38, 39].

519

520

521

522

523

524

525

526

527

528

529

530

531

532 **Author Contributions**

533 Bogoljub Ciric and Daniel Hwang were responsible for the conceptualization of this project. Daniel Hwang was  
534 responsible carrying out experiments and analysis of data.

535

536 Larissa Lumi Watanabe Ishikawa, Alexandra Boehm, Ziver Sahin, Giacomo Casella, Soohwa Jang, and  
537 Maryamsadat Seyedsadr assisted in carrying out experiments.

538

539 Michael Gonzalez, James Garifallo and Hakon Hakonarson were responsible for RNA sequencing experiments  
540 and assisted with analysis of RNA sequencing data.

541

542 Guang-Xian Zhang and Abdolmohamad Rostami assisted with manuscript preparation and provided helpful  
543 insights in interpreting data.

544

545 **Acknowledgments**

546 We thank Katherine Regan for editing the manuscript.

547

548 **Funding**

549 This work was supported by a grant from the National Multiple Sclerosis Society (RG-1803-30491) to B. Ciric.

550

551

552

553

554

555

556

557

558

559

- 561 1. Pyonteck, S.M., et al., *CSF-1R inhibition alters macrophage polarization and blocks glioma progression*. Nat Med, 2013. **19**(10): p. 1264-72. PMC3840724 PMID: 24056773.
- 562
- 563 2. Lassmann, H. and M. Bradl, *Multiple sclerosis: experimental models and reality*. Acta Neuropathol, 2017. **133**(2):
- 564 p. 223-244. PMC5250666 PMID: 27766432.
- 565 3. Ramaglia, V., et al., *Multiplexed imaging of immune cells in staged multiple sclerosis lesions by mass cytometry*.
- 566 Elife, 2019. **8**. PMC6707785 PMID: 31368890.
- 567 4. Zrzavy, T., et al., *Loss of 'homeostatic' microglia and patterns of their activation in active multiple sclerosis*. Brain,
- 568 2017. **140**(7): p. 1900-1913. PMC6057548 PMID: 28541408.
- 569 5. Machado-Santos, J., et al., *The compartmentalized inflammatory response in the multiple sclerosis brain is*
- 570 *composed of tissue-resident CD8+ T lymphocytes and B cells*. Brain, 2018. **141**(7): p. 2066-2082. PMC6022681
- 571 PMID: 29873694.
- 572 6. Croxford, A.L., et al., *The Cytokine GM-CSF Drives the Inflammatory Signature of CCR2+ Monocytes and Licenses*
- 573 *Autoimmunity*. Immunity, 2015. **43**(3): p. 502-14. PMID: 26341401.
- 574 7. Fife, B.T., et al., *CC chemokine receptor 2 is critical for induction of experimental autoimmune encephalomyelitis*.
- 575 J Exp Med, 2000. **192**(6): p. 899-905. PMC2193286 PMID: 10993920.
- 576 8. Giles, D.A., et al., *CNS-resident classical DCs play a critical role in CNS autoimmune disease*. J Clin Invest, 2018.
- 577 **128**(12): p. 5322-5334. PMC6264723 PMID: 30226829.
- 578 9. Percin, G.I., et al., *CSF1R regulates the dendritic cell pool size in adult mice via embryo-derived tissue-resident*
- 579 *macrophages*. Nat Commun, 2018. **9**(1): p. 5279. PMC6290072 PMID: 30538245.
- 580 10. Hume, D.A. and K.P. MacDonald, *Therapeutic applications of macrophage colony-stimulating factor-1 (CSF-1)*
- 581 *and antagonists of CSF-1 receptor (CSF-1R) signaling*. Blood, 2012. **119**(8): p. 1810-20. PMID: 22186992.
- 582 11. MacDonald, K.P., et al., *The colony-stimulating factor 1 receptor is expressed on dendritic cells during*
- 583 *differentiation and regulates their expansion*. J Immunol, 2005. **175**(3): p. 1399-405. PMID: 16034075.
- 584 12. Crespo, O., et al., *Tyrosine kinase inhibitors ameliorate autoimmune encephalomyelitis in a mouse model of*
- 585 *multiple sclerosis*. J Clin Immunol, 2011. **31**(6): p. 1010-20. PMC3225802 PMID: 21847523.
- 586 13. Nissen, J.C., et al., *Csf1R inhibition attenuates experimental autoimmune encephalomyelitis and promotes*
- 587 *recovery*. Exp Neurol, 2018. **307**: p. 24-36. PMID: 29803827.
- 588 14. Freskgard, P.O. and E. Urich, *Antibody therapies in CNS diseases*. Neuropharmacology, 2017. **120**: p. 38-55.
- 589 PMID: 26972827.
- 590 15. Chitu, V., et al., *Emerging Roles for CSF-1 Receptor and its Ligands in the Nervous System*. Trends Neurosci, 2016.
- 591 **39**(6): p. 378-393. PMC4884457 PMID: 27083478.
- 592 16. Wang, Y. and M. Colonna, *Interleukin-34, a cytokine crucial for the differentiation and maintenance of tissue*
- 593 *resident macrophages and Langerhans cells*. Eur J Immunol, 2014. **44**(6): p. 1575-81. PMC4137395 PMID:
- 594 24737461.
- 595 17. Sarahrudi, K., et al., *Elevated levels of macrophage colony-stimulating factor in human fracture healing*. J Orthop
- 596 Res, 2010. **28**(5): p. 671-6. PMID: 19950360.
- 597 18. Aharinejad, S., et al., *Elevated CSF1 serum concentration predicts poor overall survival in women with early*
- 598 *breast cancer*. Endocr Relat Cancer, 2013. **20**(6): p. 777-83. PMID: 24016870.
- 599 19. Hamilton, J.A., *Colony-stimulating factors in inflammation and autoimmunity*. Nat Rev Immunol, 2008. **8**(7): p.
- 600 533-44. PMID: 18551128.
- 601 20. Kawano, Y., et al., *Measurement of serum levels of macrophage colony-stimulating factor (M-CSF) in patients*
- 602 *with uremia*. Exp Hematol, 1993. **21**(2): p. 220-3. PMID: 8425560.
- 603 21. Moon, S.J., et al., *Increased levels of interleukin 34 in serum and synovial fluid are associated with rheumatoid*
- 604 *factor and anticyclic citrullinated peptide antibody titers in patients with rheumatoid arthritis*. J Rheumatol,
- 605 2013. **40**(11): p. 1842-9. PMID: 23996288.
- 606 22. Chang, E.J., et al., *IL-34 is associated with obesity, chronic inflammation, and insulin resistance*. J Clin Endocrinol
- 607 Metab, 2014. **99**(7): p. E1263-71. PMID: 24712570.
- 608 23. Wang, H., J. Cao, and X. Lai, *Serum Interleukin-34 Levels Are Elevated in Patients with Systemic Lupus*
- 609 *Erythematosus*. Molecules, 2016. **22**(1). PMID: 28036035.
- 610 24. Luo, J., et al., *Colony-stimulating factor 1 receptor (CSF1R) signaling in injured neurons facilitates protection and*
- 611 *survival*. J Exp Med, 2013. **210**(1): p. 157-72. PMC3549715 PMID: 23296467.

- 612 25. Wang, Y., et al., *Nonredundant roles of keratinocyte-derived IL-34 and neutrophil-derived CSF1 in Langerhans cell*  
613 *renewal in the steady state and during inflammation*. Eur J Immunol, 2016. **46**(3): p. 552-9. PMC5658206 PMID:  
614 26634935.
- 615 26. Okubo, M., et al., *Macrophage-Colony Stimulating Factor Derived from Injured Primary Afferent Induces*  
616 *Proliferation of Spinal Microglia and Neuropathic Pain in Rats*. PLoS One, 2016. **11**(4): p. e0153375. PMC4829214  
617 PMID: 27071004.
- 618 27. Erbllich, B., et al., *Absence of colony stimulation factor-1 receptor results in loss of microglia, disrupted brain*  
619 *development and olfactory deficits*. PLoS One, 2011. **6**(10): p. e26317. PMC3203114 PMID: 22046273.
- 620 28. Sierra, A., et al., *Microglia derived from aging mice exhibit an altered inflammatory profile*. Glia, 2007. **55**(4): p.  
621 412-24. PMID: 17203473.
- 622 29. Elmore, M.R., et al., *Colony-stimulating factor 1 receptor signaling is necessary for microglia viability, unmasking*  
623 *a microglia progenitor cell in the adult brain*. Neuron, 2014. **82**(2): p. 380-97. PMC4161285 PMID: 24742461.
- 624 30. Hawley, C.A., et al., *Csf1r-mApple Transgene Expression and Ligand Binding In Vivo Reveal Dynamics of CSF1R*  
625 *Expression within the Mononuclear Phagocyte System*. J Immunol, 2018. **200**(6): p. 2209-2223. PMC5834790  
626 PMID: 29440354.
- 627 31. Lin, C.C. and B.T. Edelson, *New Insights into the Role of IL-1beta in Experimental Autoimmune Encephalomyelitis*  
628 *and Multiple Sclerosis*. J Immunol, 2017. **198**(12): p. 4553-4560. PMC5509030 PMID: 28583987.
- 629 32. Lutz, M.B., et al., *GM-CSF Monocyte-Derived Cells and Langerhans Cells As Part of the Dendritic Cell Family*. Front  
630 Immunol, 2017. **8**: p. 1388. PMC5660299 PMID: 29109731.
- 631 33. Mildner, A., et al., *CCR2+Ly-6Chi monocytes are crucial for the effector phase of autoimmunity in the central*  
632 *nervous system*. Brain, 2009. **132**(Pt 9): p. 2487-500. PMID: 19531531.
- 633 34. Mahad, D., et al., *Modulating CCR2 and CCL2 at the blood-brain barrier: relevance for multiple sclerosis*  
634 *pathogenesis*. Brain, 2006. **129**(Pt 1): p. 212-23. PMID: 16230319.
- 635 35. Sierra-Filardi, E., et al., *CCL2 shapes macrophage polarization by GM-CSF and M-CSF: identification of*  
636 *CCL2/CCR2-dependent gene expression profile*. J Immunol, 2014. **192**(8): p. 3858-67. PMID: 24639350.
- 637 36. Stutchfield, B.M., et al., *CSF1 Restores Innate Immunity After Liver Injury in Mice and Serum Levels Indicate*  
638 *Outcomes of Patients With Acute Liver Failure*. Gastroenterology, 2015. **149**(7): p. 1896-1909 e14. PMC4672154  
639 PMID: 26344055.
- 640 37. Tagliani, E., et al., *Coordinate regulation of tissue macrophage and dendritic cell population dynamics by CSF-1*. J  
641 Exp Med, 2011. **208**(9): p. 1901-16. PMC3171096 PMID: 21825019.
- 642 38. Huang da, W., B.T. Sherman, and R.A. Lempicki, *Systematic and integrative analysis of large gene lists using*  
643 *DAVID bioinformatics resources*. Nat Protoc, 2009. **4**(1): p. 44-57. PMID: 19131956.
- 644 39. Huang da, W., B.T. Sherman, and R.A. Lempicki, *Bioinformatics enrichment tools: paths toward the*  
645 *comprehensive functional analysis of large gene lists*. Nucleic Acids Res, 2009. **37**(1): p. 1-13. PMC2615629  
646 PMID: 19033363.
- 647 40. Hemmings, B.A. and D.F. Restuccia, *PI3K-PKB/Akt pathway*. Cold Spring Harb Perspect Biol, 2012. **4**(9): p.  
648 a011189. PMC3428770 PMID: 22952397.
- 649 41. Rietkotter, E., et al., *Anti-CSF-1 treatment is effective to prevent carcinoma invasion induced by monocyte-*  
650 *derived cells but scarcely by microglia*. Oncotarget, 2015. **6**(17): p. 15482-93. PMC4558165 PMID: 26098772.
- 651 42. Fleetwood, A.J., et al., *Granulocyte-macrophage colony-stimulating factor (CSF) and macrophage CSF-dependent*  
652 *macrophage phenotypes display differences in cytokine profiles and transcription factor activities: implications*  
653 *for CSF blockade in inflammation*. J Immunol, 2007. **178**(8): p. 5245-52. PMID: 17404308.
- 654 43. Sierra-Filardi, E., et al., *Activin A skews macrophage polarization by promoting a proinflammatory phenotype and*  
655 *inhibiting the acquisition of anti-inflammatory macrophage markers*. Blood, 2011. **117**(19): p. 5092-101. PMID:  
656 21389328.
- 657 44. Verreck, F.A., et al., *Human IL-23-producing type 1 macrophages promote but IL-10-producing type 2*  
658 *macrophages subvert immunity to (myco)bacteria*. Proc Natl Acad Sci U S A, 2004. **101**(13): p. 4560-5.  
659 PMC384786 PMID: 15070757.
- 660 45. Komohara, Y., et al., *Possible involvement of the M2 anti-inflammatory macrophage phenotype in growth of*  
661 *human gliomas*. J Pathol, 2008. **216**(1): p. 15-24. PMID: 18553315.
- 662 46. Foucher, E.D., et al., *IL-34 induces the differentiation of human monocytes into immunosuppressive*  
663 *macrophages. antagonistic effects of GM-CSF and IFNgamma*. PLoS One, 2013. **8**(2): p. e56045. PMC3568045  
664 PMID: 23409120.

- 665 47. Smith, A.M., et al., *M-CSF increases proliferation and phagocytosis while modulating receptor and transcription*  
666 *factor expression in adult human microglia*. J Neuroinflammation, 2013. **10**: p. 85. PMC3729740 PMID:  
667 23866312.
- 668 48. Guan, Y., et al., *Antigen presenting cells treated in vitro by macrophage colony-stimulating factor and*  
669 *autoantigen protect mice from autoimmunity*. J Neuroimmunol, 2007. **192**(1-2): p. 68-78. PMC2743086 PMID:  
670 18006080.
- 671 49. MacDonald, K.P., et al., *An antibody against the colony-stimulating factor 1 receptor depletes the resident subset*  
672 *of monocytes and tissue- and tumor-associated macrophages but does not inhibit inflammation*. Blood, 2010.  
673 **116**(19): p. 3955-63. PMID: 20682855.
- 674 50. Hamilton, J.A. and A. Achuthan, *Colony stimulating factors and myeloid cell biology in health and disease*. Trends  
675 Immunol, 2013. **34**(2): p. 81-9. PMID: 23000011.
- 676 51. Djelloul, M., et al., *RAE-1 expression is induced during experimental autoimmune encephalomyelitis and is*  
677 *correlated with microglia cell proliferation*. Brain Behav Immun, 2016. **58**: p. 209-217. PMID: 27444966.
- 678 52. Smith, A.M., et al., *Adult human glia, pericytes and meningeal fibroblasts respond similarly to IFN $\gamma$  but not to*  
679 *TGF $\beta$ 1 or M-CSF*. PLoS One, 2013. **8**(12): p. e80463. PMC3855168 PMID: 24339874.
- 680 53. Caescu, C.I., et al., *Colony stimulating factor-1 receptor signaling networks inhibit mouse macrophage*  
681 *inflammatory responses by induction of microRNA-21*. Blood, 2015. **125**(8): p. e1-13. PMC4335087 PMID:  
682 25573988.
- 683 54. De, I., et al., *CSF1 overexpression has pleiotropic effects on microglia in vivo*. Glia, 2014. **62**(12): p. 1955-67.  
684 PMC4205273 PMID: 25042473.
- 685 55. Wei, S., et al., *Functional overlap but differential expression of CSF-1 and IL-34 in their CSF-1 receptor-mediated*  
686 *regulation of myeloid cells*. J Leukoc Biol, 2010. **88**(3): p. 495-505. 2924605 PMID: 20504948.
- 687 56. Stanley, E.R. and V. Chitu, *CSF-1 receptor signaling in myeloid cells*. Cold Spring Harb Perspect Biol, 2014. **6**(6).  
688 PMC4031967 PMID: 24890514.
- 689 57. Brizzi, M.F., et al., *Regulation of c-kit expression in human myeloid cells*. Stem Cells, 1993. **11 Suppl 2**: p. 42-8.  
690 PMID: 7691327.
- 691 58. Kusmartsev, S. and D.I. Gabrilovich, *Effect of tumor-derived cytokines and growth factors on differentiation and*  
692 *immune suppressive features of myeloid cells in cancer*. Cancer Metastasis Rev, 2006. **25**(3): p. 323-31.  
693 PMC1693571 PMID: 16983515.
- 694 59. Berardi, A.C., et al., *Basic fibroblast growth factor mediates its effects on committed myeloid progenitors by*  
695 *direct action and has no effect on hematopoietic stem cells*. Blood, 1995. **86**(6): p. 2123-9. PMID: 7662960.
- 696 60. Heo, S.K., et al., *Targeting c-KIT (CD117) by dasatinib and radotinib promotes acute myeloid leukemia cell death*.  
697 Sci Rep, 2017. **7**(1): p. 15278. PMC5681687 PMID: 29127384.
- 698 61. Qin, H., et al., *FGFR1OP2-FGFR1 induced myeloid leukemia and T-cell lymphoma in a mouse model*.  
699 Haematologica, 2016. **101**(3): p. e91-4. PMC4815735 PMID: 26589915.
- 700 62. Zhao, L., P. Ye, and T.J. Gonda, *The MYB proto-oncogene suppresses monocytic differentiation of acute myeloid*  
701 *leukemia cells via transcriptional activation of its target gene GF11*. Oncogene, 2014. **33**(35): p. 4442-9. PMID:  
702 24121275.
- 703 63. Demoulin, J.B. and C.P. Montano-Almendras, *Platelet-derived growth factors and their receptors in normal and*  
704 *malignant hematopoiesis*. Am J Blood Res, 2012. **2**(1): p. 44-56. PMC3301440 PMID: 22432087.
- 705 64. Song, G., Y. Li, and G. Jiang, *Role of VEGF/VEGFR in the pathogenesis of leukemias and as treatment targets*  
706 *(Review)*. Oncol Rep, 2012. **28**(6): p. 1935-44. PMID: 22993103.
- 707 65. Kara, E.E., et al., *CCR2 defines in vivo development and homing of IL-23-driven GM-CSF-producing Th17 cells*. Nat  
708 Commun, 2015. **6**: p. 8644. PMC4639903 PMID: 26511769.
- 709 66. Huang, D.R., et al., *Absence of monocyte chemoattractant protein 1 in mice leads to decreased local macrophage*  
710 *recruitment and antigen-specific T helper cell type 1 immune response in experimental autoimmune*  
711 *encephalomyelitis*. J Exp Med, 2001. **193**(6): p. 713-26. PMC2193420 PMID: 11257138.
- 712 67. Chu, H.X., et al., *Role of CCR2 in inflammatory conditions of the central nervous system*. J Cereb Blood Flow  
713 Metab, 2014. **34**(9): p. 1425-9. PMC4158674 PMID: 24984897.
- 714 68. McGinley, A.M., et al., *Interleukin-17A Serves a Priming Role in Autoimmunity by Recruiting IL-1 $\beta$ -Producing*  
715 *Myeloid Cells that Promote Pathogenic T Cells*. Immunity, 2020. **52**(2): p. 342-356 e6. PMID: 32023490.

- 716 69. Komuczki, J., et al., *Fate-Mapping of GM-CSF Expression Identifies a Discrete Subset of Inflammation-Driving T*  
717 *Helper Cells Regulated by Cytokines IL-23 and IL-1beta*. *Immunity*, 2019. **50**(5): p. 1289-1304 e6. PMID:  
718 31079916.
- 719 70. Pare, A., et al., *IL-1beta enables CNS access to CCR2(hi) monocytes and the generation of pathogenic cells*  
720 *through GM-CSF released by CNS endothelial cells*. *Proc Natl Acad Sci U S A*, 2018. **115**(6): p. E1194-E1203.  
721 PMC5819409 PMID: 29358392.
- 722 71. Novartis Pharmaceuticals. *MCS110 in Patients With Pigmented Villonodular Synovitis (PVNS) or Giant Cell Tumor*  
723 *of the Tendon Sheath (GCTTS)*. 2012 [cited 2015 12/29/2015]; Available from:  
724 <https://clinicaltrials.gov/ct2/show/NCT01643850>.
- 725 72. Novartis Pharmaceuticals. *Efficacy Study of MCS110 Given With Carboplatin and Gemcitabine in Advanced Triple*  
726 *Negative Breast Cancer (TNBC)*. 2015 [cited 2015 12/29/2015]; Available from:  
727 <https://clinicaltrials.gov/ct2/show/NCT02435680>.
- 728 73. Novartis Pharmaceuticals. *A Phase I/II Open-label Study of MCS110 in Patients With Prostate Cancer and Bone*  
729 *Metastases*. 2008 [cited 2015 12/29/2015]; Available from: <https://clinicaltrials.gov/ct2/show/NCT00757757>.
- 730 74. Company, E.L.a. *A Study of IMC-CS4 in Subjects With Advanced Solid Tumors*. 2011 [cited 2015 12/29/2015];  
731 Available from: <https://clinicaltrials.gov/ct2/show/NCT01346358>.
- 732 75. Cassier, P.A., et al., *CSF1R inhibition with emactuzumab in locally advanced diffuse-type tenosynovial giant cell*  
733 *tumours of the soft tissue: a dose-escalation and dose-expansion phase 1 study*. *Lancet Oncol*, 2015. **16**(8): p.  
734 949-56. PMID: 26179200.
- 735 76. Genovese, M.C., et al., *Results from a Phase IIA Parallel Group Study of JNJ-40346527, an Oral CSF-1R Inhibitor,*  
736 *in Patients with Active Rheumatoid Arthritis despite Disease-modifying Antirheumatic Drug Therapy*. *J*  
737 *Rheumatol*, 2015. **42**(10): p. 1752-60. PMID: 26233509.
- 738 77. Butowski, N., et al., *Orally administered colony stimulating factor 1 receptor inhibitor PLX3397 in recurrent*  
739 *glioblastoma: an Ivy Foundation Early Phase Clinical Trials Consortium phase II study*. *Neuro Oncol*, 2016. **18**(4):  
740 p. 557-64. PMC4799682 PMID: 26449250.
- 741 78. Tap, W.D., et al., *Structure-Guided Blockade of CSF1R Kinase in Tenosynovial Giant-Cell Tumor*. *N Engl J Med*,  
742 2015. **373**(5): p. 428-37. PMID: 26222558.
- 743 79. Goyal, A., et al., *Ultra-Fast Next Generation Human Genome Sequencing Data Processing Using DRAGEN Bio-IT*  
744 *Processor for Precision Medicine*. *Open Journal of Genetics*, 2017. **Vol. 7**(No. 1). PMID.
- 745 80. Love, M.I., W. Huber, and S. Anders, *Moderated estimation of fold change and dispersion for RNA-seq data with*  
746 *DESeq2*. *Genome Biol*, 2014. **15**(12): p. 550. PMC4302049 PMID: 25516281.

747

748

749

750

751

752

753

754

755

756

757

758



FIGURES

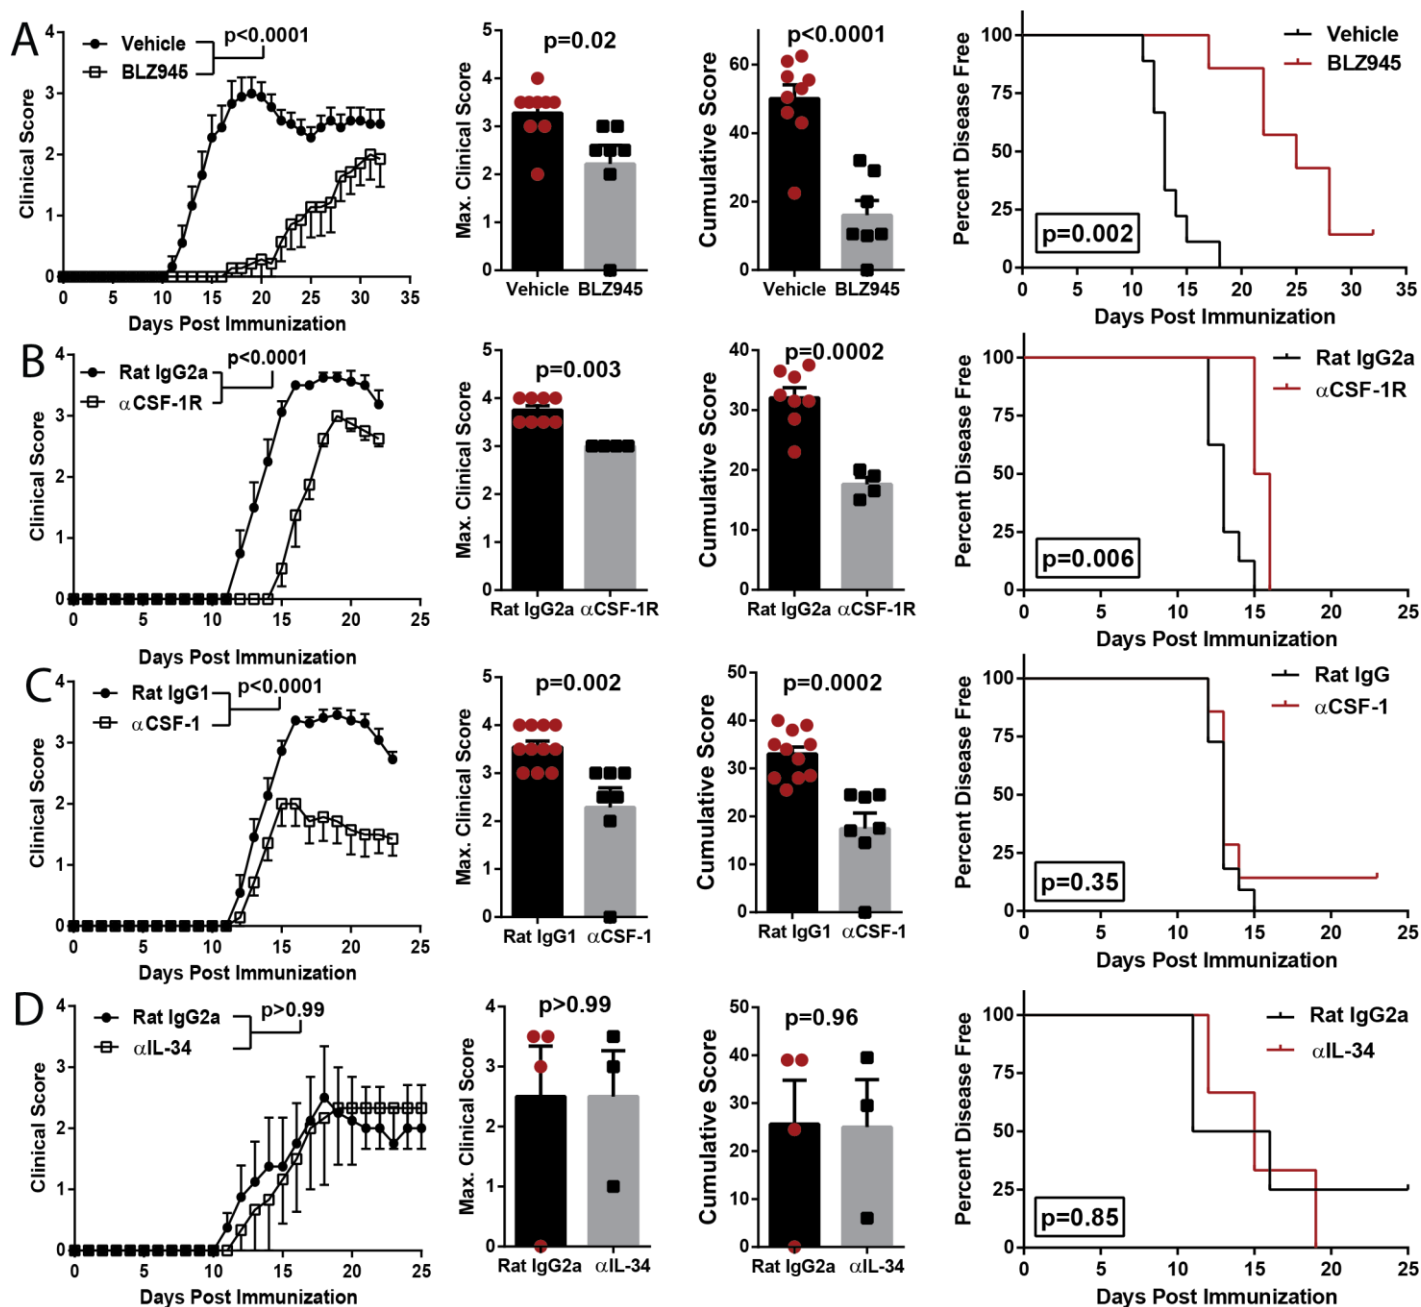

**Figure 1: Blocking CSF-1R activity suppresses EAE.** A-D) C57BL/6J mice were immunized with MOG<sub>35-55</sub> for EAE induction. Clinical course, maximum and cumulative clinical scores, and Kaplan-Meier plots depicting percent of disease-free animals over time are shown. Significance for clinical course data was calculated by two-way repeated measures ANOVA. Significance for maximum and cumulative clinical scores was calculated by Student's *t*-test. Error bars are S.E.M. Significance for Kaplan-Meier plots was calculated by comparing disease-free curves with the log-rank (Mantel-Cox) test. **A)** EAE animals treated orally with BLZ945 (n=9; 4 mg/day [1]) or vehicle (n=7; 20% Captisol) daily, starting from day of immunization. Data were compiled from two independent experiments. **B)** Treatment with anti-CSF-1R MAb (n=4) or control rat IgG2a (n=8). MAbs were i.p. injected every other day (400  $\mu$ g per dose). **C)** Treatment with anti-CSF-1 MAb (n=7) or control rat IgG1 (n=11). MAbs were i.p. injected every other day (200  $\mu$ g per dose). Data were compiled from two independent experiments. **D)** Treatment with anti-IL-34 MAb (n=3) or control rat IgG2a MAb (n=4). MAbs were i.p. injected every other day (100  $\mu$ g per dose).

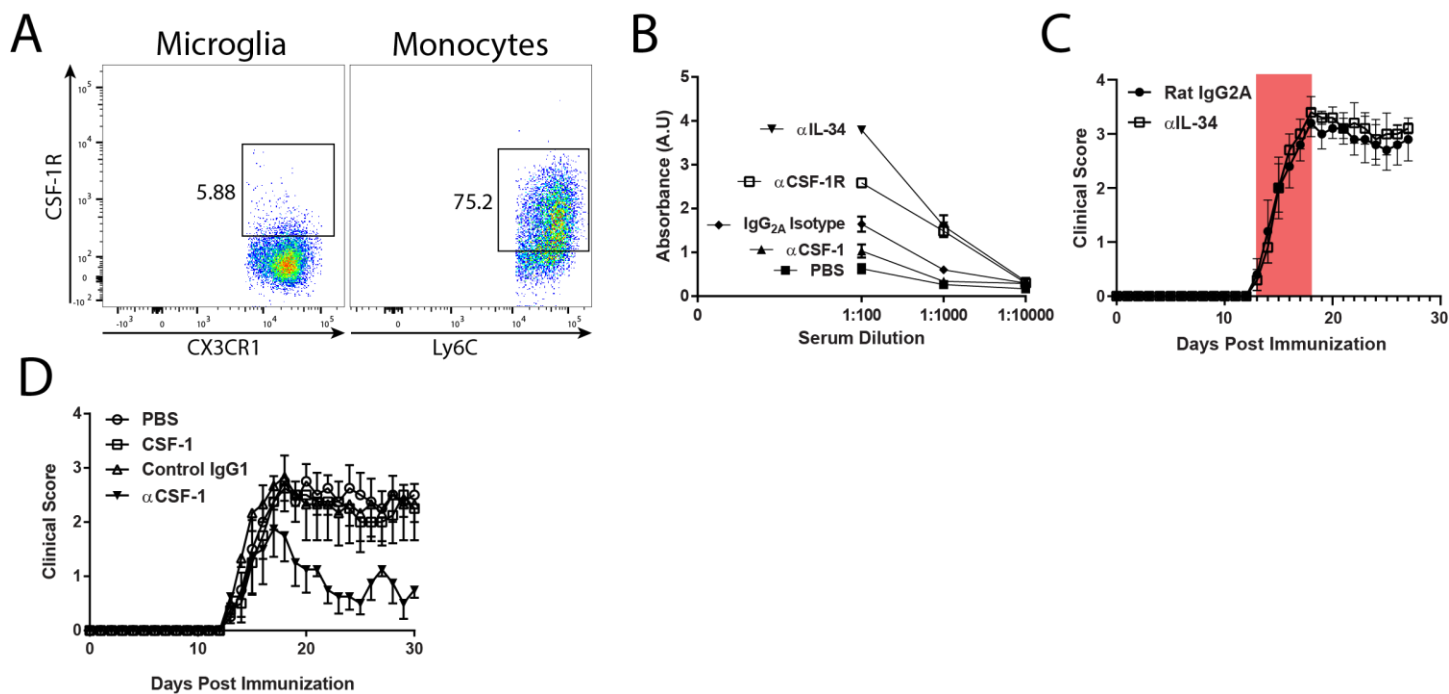

763

764

**Supplemental Figure 1: A)** C57BL6/J mice were immunized with MOG<sub>35-55</sub> and treated with anti-CSF1 MAb (200  $\mu$ g, every other day), control rat IgG1 MAb (200  $\mu$ g, every other day), recombinant mouse CSF-1 (4  $\mu$ g per dose, given on days 4, 8, 12, 16 p.i.) or PBS by i.p. injection. **B)** Serum Ab titers of mice with EAE treated with MAbs against IL-34 (n=3), CSF-1R (n=3), IgG2a isotype (n=4), CSF1 (n=3), and control animals treated with PBS (n=6). Error bars are standard error from the mean. **C)** Flow cytometry plots depicting staining of CD45<sup>+</sup>CD11b<sup>+</sup>CX3CR1<sup>Hi</sup> microglia and CD45<sup>Hi</sup>CD11b<sup>+</sup>Ly6G<sup>+</sup>Ly6C<sup>Hi</sup> monocytes for CSF-1R with the AFS98 MAb. **D)** C57BL6/J mice were immunized with MOG<sub>35-55</sub> and treated with anti-IL-34 Mab (55  $\mu$ g per day, i.p) for the period indicated by the red box.

765

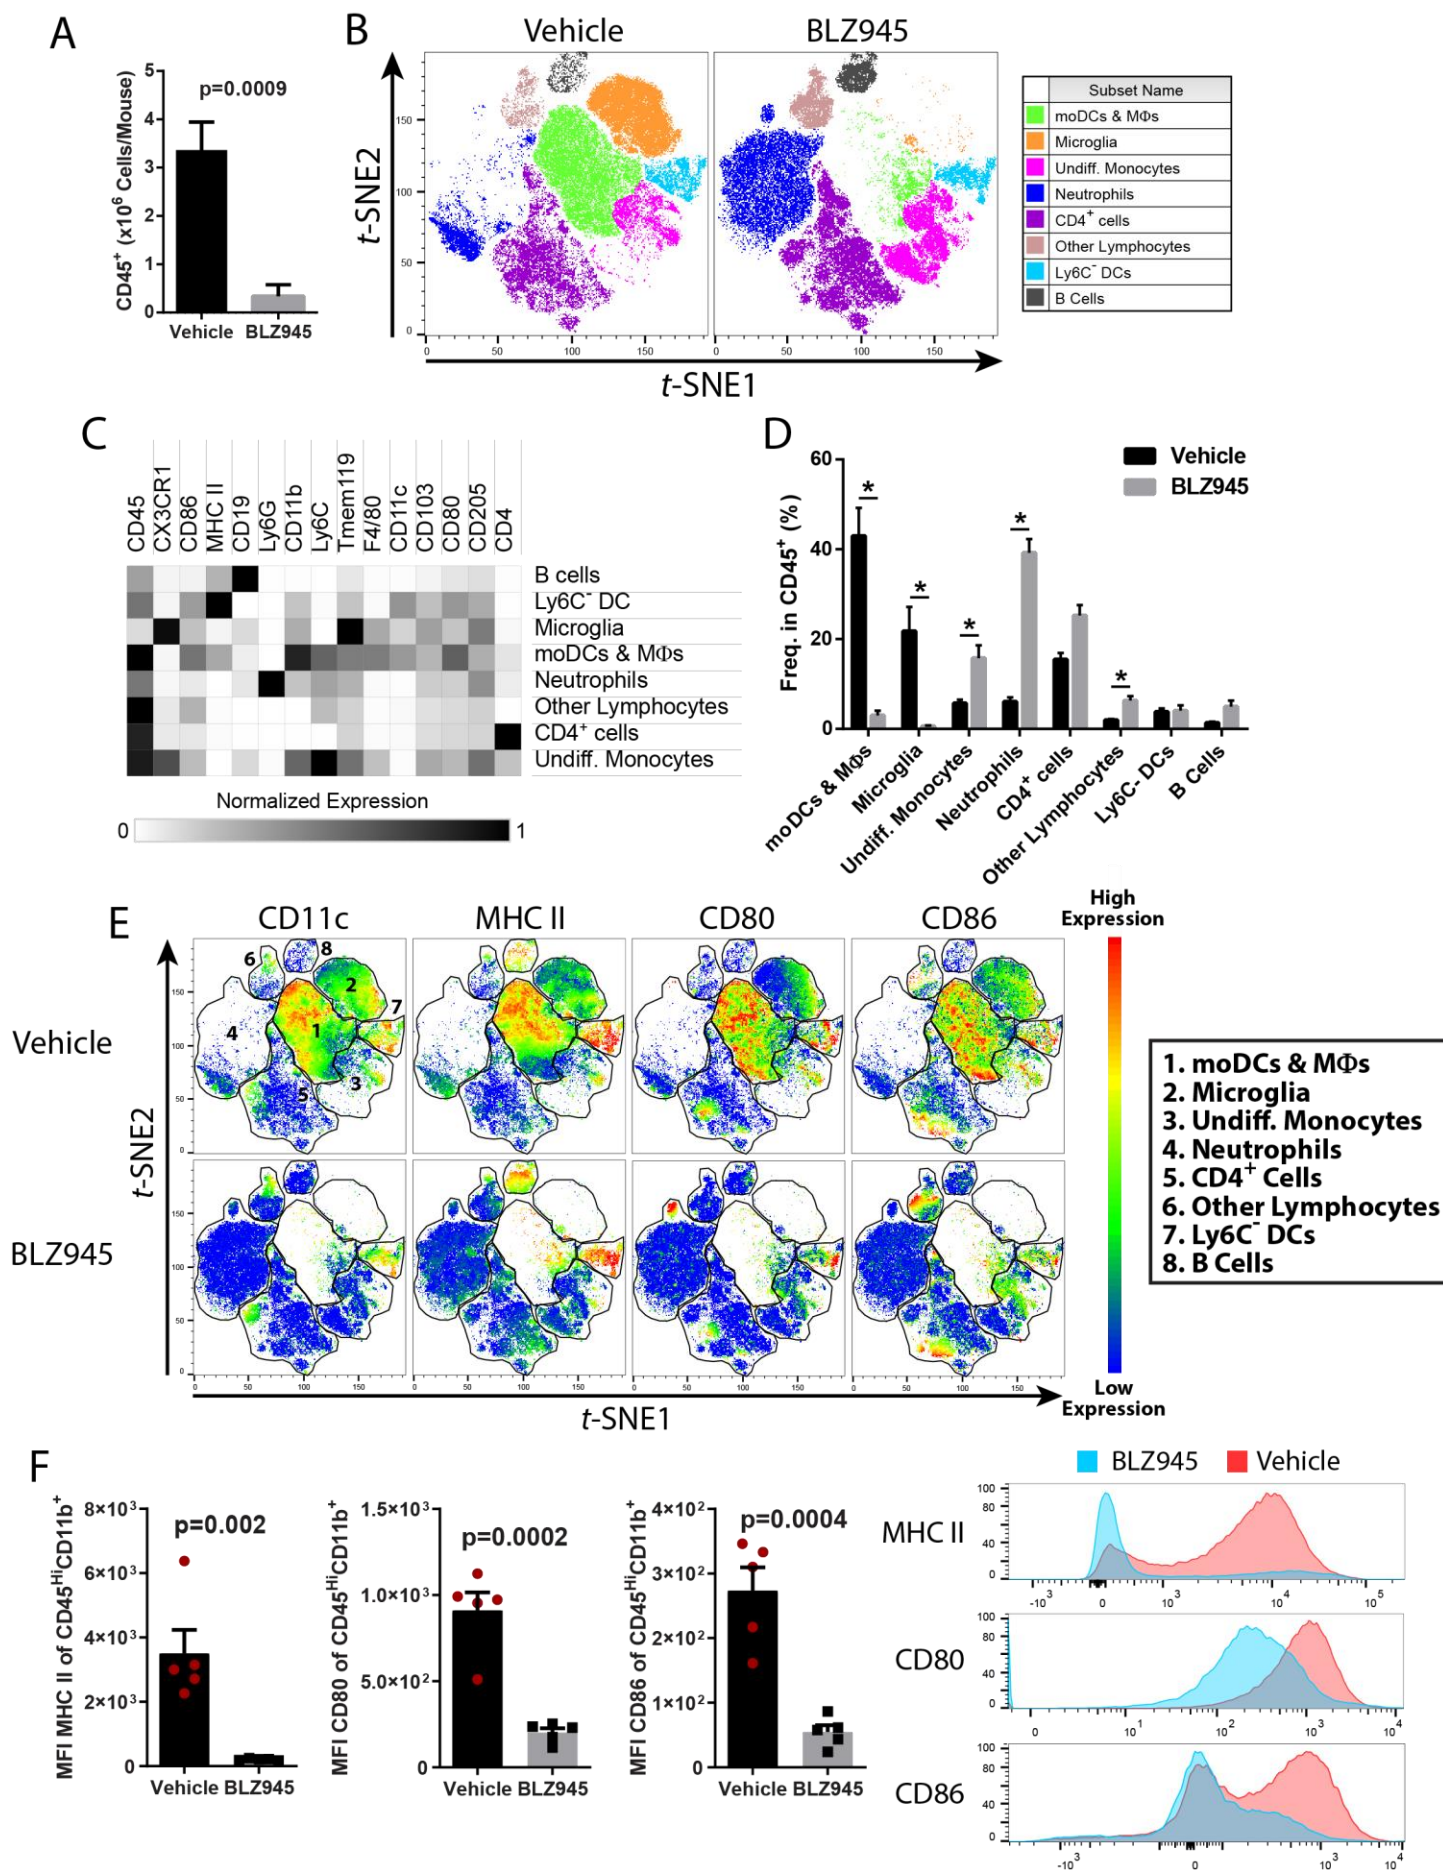

**Figure 2: CSF-1R inhibition depletes myeloid APCs in the CNS of mice with EAE.** C57BL/6J mice were immunized with MOG<sub>35-55</sub> for EAE induction and treated orally with BLZ945 (4 mg/day) or vehicle control (20% captisol) daily, starting on the day of immunization. Mice were sacrificed on day 15 p.i., and brain and spinal cords were pooled for cell isolation. **A)** Numbers of CNS CD45<sup>+</sup> cells (n=7/group, combined from two independent experiments). **B)** *t*-SNE plot depicting clustering of CD45<sup>+</sup> cells (n=5 mice per group). moDCs and macrophages were defined by their expression of CD11b, CD11c, MHC II, CD80 and CD86. Microglia were defined as CD45<sup>+</sup>CD11b<sup>+</sup>Tmem119<sup>+</sup>CX3CR1<sup>Hi</sup> cells. Undifferentiated monocytes were defined as CD45<sup>Hi</sup>Ly6C<sup>Hi</sup>CD11c<sup>-</sup> cells that were overall MHC II<sup>Lo/Neg</sup>. Neutrophils were defined as CD45<sup>+</sup>CD11b<sup>+</sup>Ly6G<sup>Hi</sup>. CD4<sup>+</sup> cells were defined as CD45<sup>+</sup>CD4<sup>+</sup>. Other lymphocytes were defined as CD45<sup>Hi</sup>SSC<sup>Lo</sup>. Ly6C<sup>-</sup>DCs were defined as CD45<sup>Hi</sup>CD11b<sup>+</sup>CD11c<sup>+</sup>MHCII<sup>Hi</sup>Ly6C<sup>-</sup> cells. B cells were defined as CD45<sup>+</sup>CD19<sup>+</sup>. **C)** Heatmap showing normalized expression of markers used to identify clusters. **D)** Quantification of clusters between vehicle and BLZ945-treated mice with EAE. **E)** Heat map of CD11c, MHC II, CD80 and CD86 expression among CD45<sup>+</sup> cells. **F)** MFI of MHC II, CD80 and CD86 among CD45<sup>Hi</sup>CD11b<sup>+</sup> myeloid cells. Representative histograms showing fluorescence intensity of MHC II, CD80 and CD86 between vehicle- and BLZ945-treated animals is also shown. Y-axis is frequency of cells as normalized to mode. Significance was calculated with Student's t test. For D), \* indicates a p-value less than 0.02. Error bars are S.E.M.

767

768

769

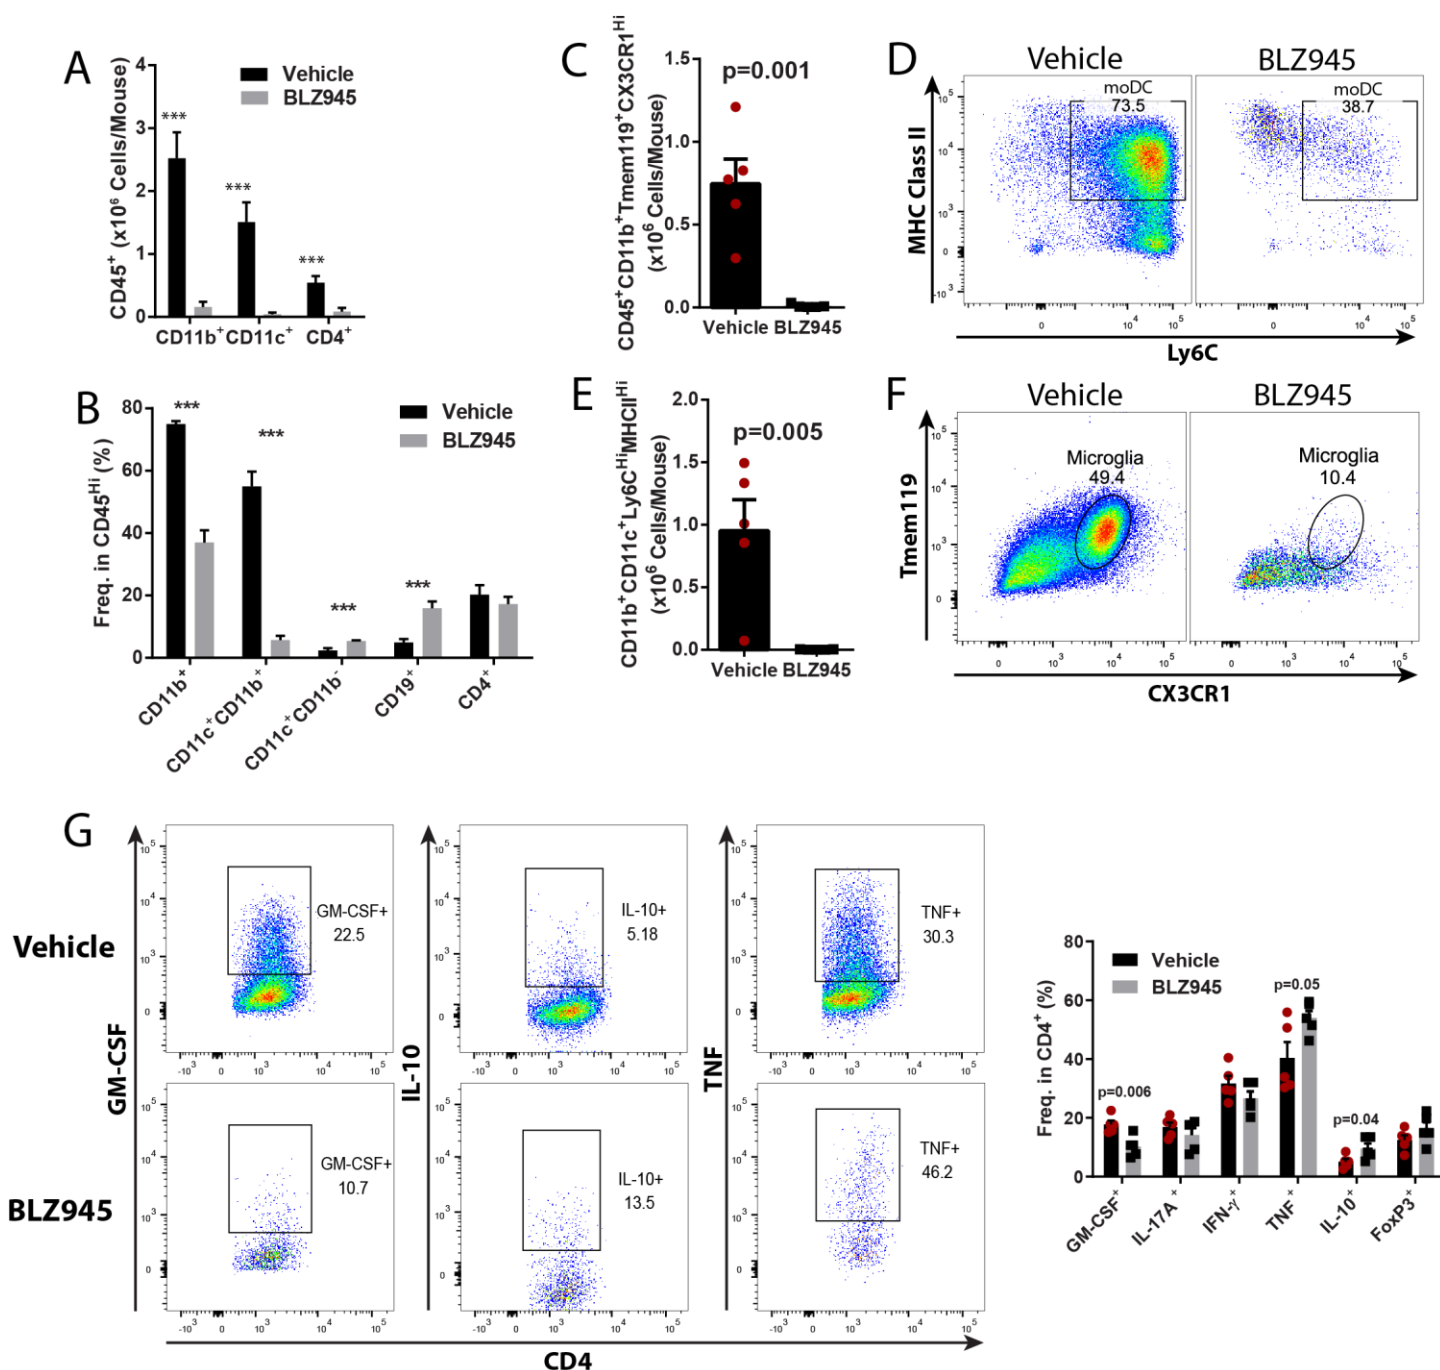

**Supplementary Figure 2: Inhibition of CSF-1R signaling alters both myeloid and T cell compartments in the CNS of EAE mice.** C57BL/6J mice were immunized with MOG<sub>35-55</sub> for EAE induction and treated orally with BLZ945 (200 mg/kg/day) or vehicle control (20% captisol) daily, starting on the day of immunization. Mice were sacrificed on day 15 p.i., and pooled brain and spinal cords of each mouse were used for cell isolation (n=5/group). **A**) Numbers of CD11b<sup>+</sup>, CD11c<sup>+</sup> and CD4<sup>+</sup> cells. **B**) Frequency of CD11b<sup>+</sup>, CD11b<sup>+</sup>CD11c<sup>+</sup>, CD11b<sup>+</sup>CD11c<sup>-</sup>, CD19<sup>+</sup>, and CD4<sup>+</sup> cells in CD45<sup>Hi</sup> cells. **C-F**) Numbers of CD45<sup>+</sup>CD11b<sup>+</sup>Tmem119<sup>+</sup>CX3CR1<sup>Hi</sup> microglia and CD45<sup>Hi</sup>CD11b<sup>+</sup>Ly6C<sup>Hi</sup>MHCII<sup>Hi</sup> moDCs. **G**) Quantification of GM-CSF, IL-17A, IFN- $\gamma$ , TNF, IL-10 and FoxP3 expression by CD4<sup>+</sup> cells from the CNS. Significance was calculated with Student's t test. Error bars are S.E.M.

770

771

772

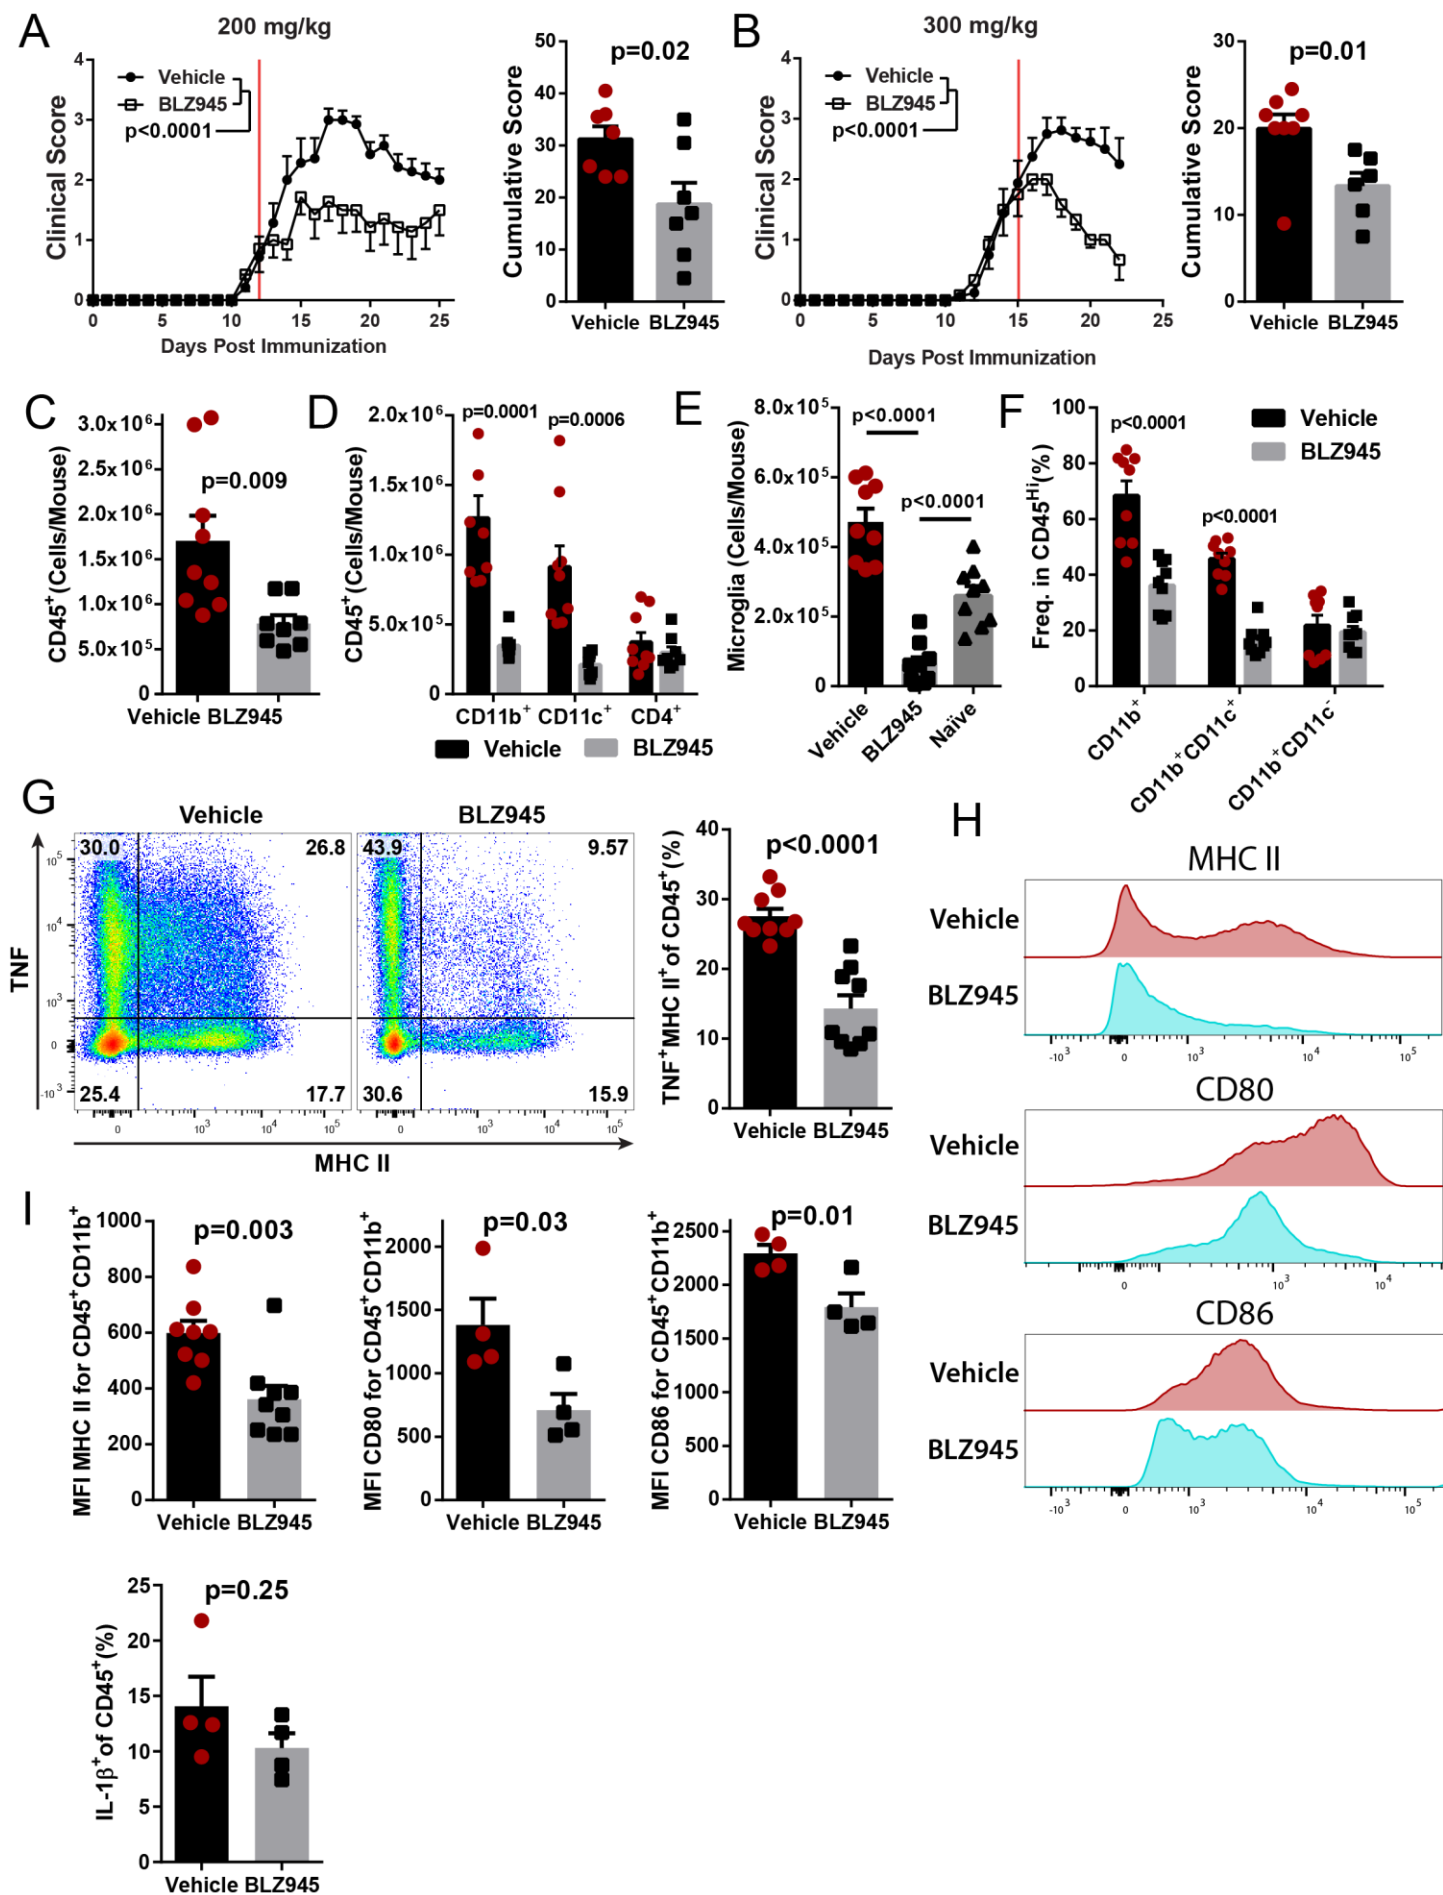

**Figure 3. BLZ945 suppresses ongoing clinical EAE, and reduces the number of myeloid APCs in the CNS.** C57BL/6J mice were immunized and allowed to develop clinical signs of EAE before treatment with BLZ945 (n=7) or vehicle (n=8). Treatments were given once per day by oral gavage. **A)** Clinical course and cumulative score for mice treated with 200 mg/kg BLZ945 starting at a clinical score of ~1. Red line indicates start of treatment. **B)** Mice treated with 300 mg/kg BLZ945 (n=6) or vehicle (n=8), starting at a clinical score of ~2. A) and B) were compiled from two independent experiments. Significance for clinical course determined by two-way repeated measures ANOVA, and by unpaired Student's t-test for cumulative scores. **C-I)** Analysis of the CNS (pooled brain and spinal cords) by flow cytometry. **C)** Number of CD45<sup>+</sup> cells. **D)** Number of CD45<sup>+</sup> cells that also expressed CD11b, CD11c, or CD4. **E)** Number of CD45<sup>Lo</sup>CD11b<sup>+</sup>CX3CR1<sup>Hi</sup> microglia. Naïve mice are untreated WT C57BL/6J mice that were not immunized or otherwise manipulated. **F)** Frequency of CD45<sup>Hi</sup> cells that also express CD11b and/or CD11c. **G)** TNF and MHC II expression in CD45<sup>+</sup> cells. **H-I)** Expression of MHC II, CD80 and CD86 in CD45<sup>+</sup>CD11b<sup>+</sup> cells. Significance for C-I was calculated by unpaired Student's t test. P-value corrections for multiple comparisons was performed by false discovery rate approach with Q=0.01 as a cutoff. Error bars are S.E.M.

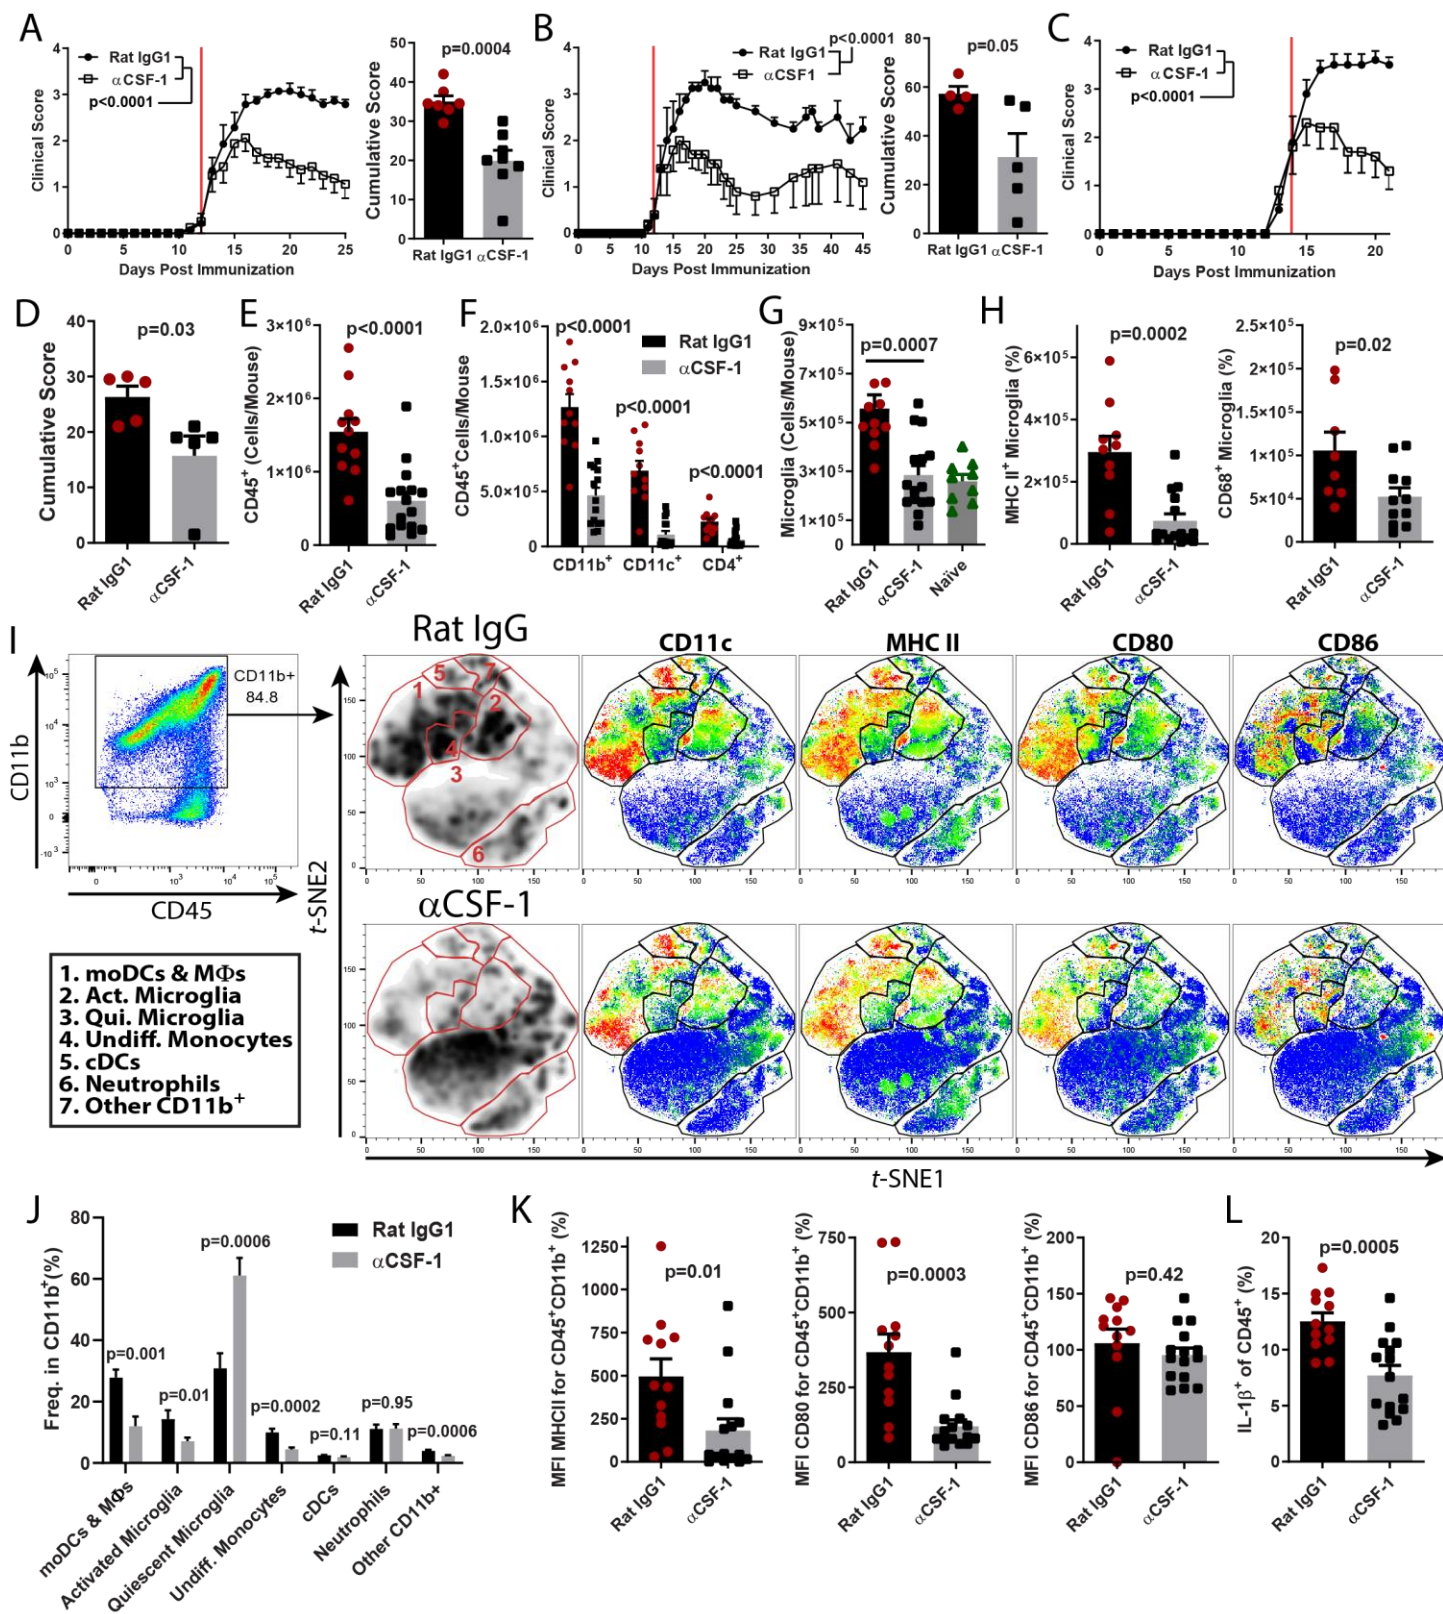



**Figure 4: CSF-1 controls the population size of inflammatory myeloid cells in the CNS during EAE. A)** Clinical course and cumulative score of mice with EAE treated with  $\alpha$ CSF-1 MAb starting after disease onset (n=7 per group; compiled from 2 independent experiments). Red line denotes day that treatment was started. Mice were treated with 200  $\mu$ g MAb per day. **B)** Clinical course and cumulative scores of mice treated long term with  $\alpha$ CSF-1 MAb. Mice were treated daily until day 25, and then every other day for the duration of the experiment. **C-D)** Clinical course and cumulative score for mice treated with  $\alpha$ CSF-1 MAb, starting at clinical score of 2.0 (n=4-5 per group). **E-L)** Characterization of immune cells from the CNS of control MAb- and  $\alpha$ CSF-1 MAb-treated mice. **E)** Number of CD45<sup>+</sup> cells. **F)** Numbers of CD11b<sup>+</sup>, CD11c<sup>+</sup> and CD4<sup>+</sup> cells. **G)** Numbers of CD45<sup>+</sup>CD11b<sup>+</sup> CX3CR1<sup>Hi</sup>Tmem119<sup>+</sup> microglia in control-treated,  $\alpha$ CSF-1 MAb-treated, and naïve mice. **H)** Numbers of MHC II<sup>+</sup> and CD68<sup>+</sup> microglia in control MAb- and  $\alpha$ CSF-1 MAb-treated mice. **I)** *t*-SNE analysis of CD45<sup>+</sup>CD11b<sup>+</sup> cells. moDCs and macrophages were defined by their expression of CD11b, CD11c, MHC II, CD80 and CD86. Activated microglia were defined as CD45<sup>+</sup>CD11b<sup>+</sup>Tmem119<sup>+</sup>CX3CR1<sup>Hi</sup>MHCII<sup>+</sup>CD68<sup>+/-</sup> cells. Quiescent microglia were defined as CD45<sup>+</sup>CD11b<sup>+</sup>Tmem119<sup>+</sup>CX3CR1<sup>Hi</sup>MHCII<sup>-</sup>CD68<sup>-</sup>. Undifferentiated monocytes were defined as CD45<sup>Hi</sup>Ly6C<sup>Hi</sup>CD11c<sup>-</sup> cells that were overall MHC II<sup>Lo/Neg</sup>. Neutrophils were defined as CD45<sup>+</sup>CD11b<sup>+</sup>Ly6G<sup>Hi</sup>. CD4<sup>+</sup> cells were defined as CD45<sup>+</sup>CD4<sup>+</sup>. cDCs were defined as CD45<sup>Hi</sup>CD11b<sup>+</sup>CD11c<sup>+</sup>MHCII<sup>Hi</sup>Ly6C<sup>-</sup>CD26<sup>+</sup> cells. Other CD11b<sup>+</sup> cells expressed CD11c and CX3CR1 but did not express markers for antigen presentation. **J)** Quantification of clusters from I). **K)** Median fluorescence intensity of MHC II, CD80 and CD86 in CD45<sup>+</sup>CD11b<sup>+</sup> cells. **L)** Frequency of IL-1 $\beta$ <sup>+</sup> cells among CD45<sup>+</sup> cells. Significance was calculated with unpaired Student's t test. Error bars are S.E.M.

776

777

778

779

780

781

782

783

784

785

786

787

788

789

790

791

792

793

794

795

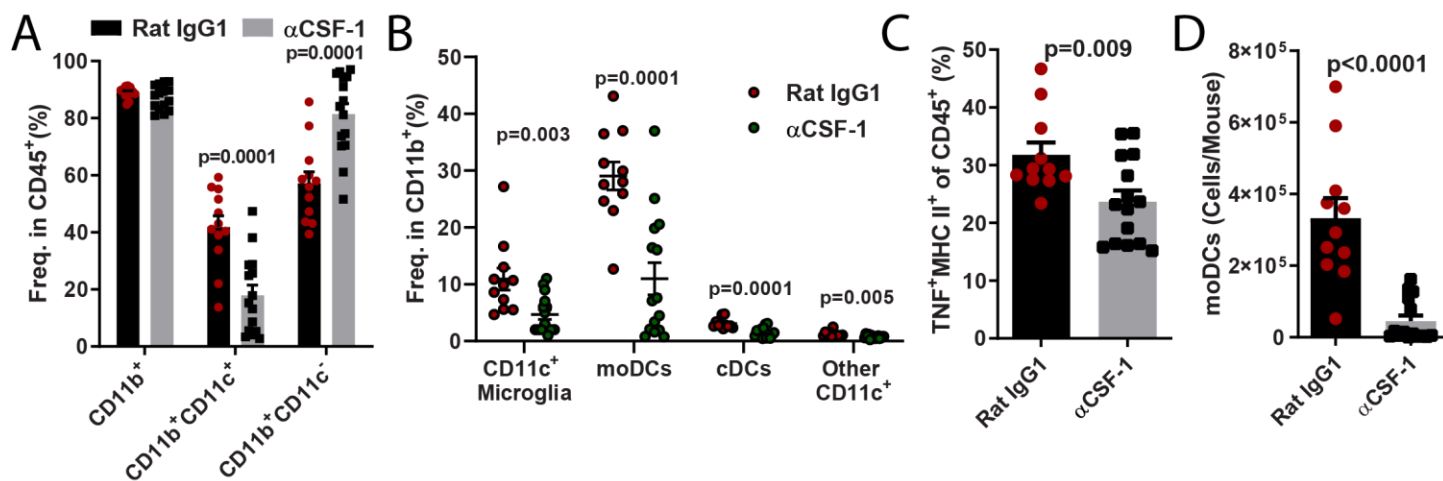

796

**Supplementary Figure 3: Anti-CSF-1 treatment reduces numbers of DCs in the CNS of mice with EAE. A)** Frequency of CD11b<sup>+</sup>, CD11b<sup>+</sup>CD11c<sup>+</sup>, CD11b<sup>+</sup>CD11c<sup>-</sup> cells among CD45<sup>+</sup> cells from the CNS of mice with EAE treated with either anti-CSF-1 or control MAb. **B)** Frequency of CD11c<sup>+</sup> microglia (CD45<sup>+</sup>CD11b<sup>+</sup>CX3CR1<sup>Hi</sup>Tmem119<sup>+</sup>), moDCs (CD45<sup>Hi</sup>CD11b<sup>+</sup>CD11c<sup>+</sup>Ly6G<sup>-</sup>Ly6C<sup>Hi</sup>MHC II<sup>Hi</sup>), cDCs (CD45<sup>Hi</sup>CD11b<sup>+</sup>CD11c<sup>+</sup>CD26<sup>+</sup>Ly6C<sup>-</sup>MHCII<sup>+</sup>) and other CD11c<sup>+</sup> cells among CD11b<sup>+</sup> cells. **C)** Number of CD45<sup>Hi</sup>CD11b<sup>+</sup>CD11c<sup>+</sup>Ly6G<sup>-</sup>Ly6C<sup>Hi</sup>MHC II<sup>Hi</sup> moDCs. **D)** Frequency of TNF<sup>+</sup>MHC II<sup>+</sup> cells among CD45<sup>+</sup> cells. Significance was calculated with unpaired Student's t test. Error bars are S.E.M.



**Figure 5: CSF-1R inhibition depletes myeloid DCs and monocytes in peripheral lymphoid compartments.** Characterization of immune cells in the spleen, blood and dLNs from MOG<sub>35-55</sub>-immunized mice sacrificed on day 8 p.i.. **A-C)** BLZ945- and vehicle-treated mice (n=5 per group). Numbers of CD11b<sup>+</sup>CD11c<sup>+</sup>, moDCs, monocytes and neutrophils in **A)** spleen, **B)** blood, and **C)** dLN. **E-F)** Same quantification as in A-C) but for anti-CSF-1- and rat IgG1 control MAbs-treated mice. **G)** [<sup>3</sup>H]Thymidine proliferation assay for MOG<sub>35-55</sub>-stimulated splenocytes and dLNs cells from BLZ945- and vehicle-treated mice harvested on day 8 p.i. **H)** Same analyses as in G), but for anti-CSF-1- and rat IgG1 control MAb-treated mice. **I)** [<sup>3</sup>H]Thymidine proliferation assay for MOG<sub>35-55</sub>-stimulated splenocytes and dLNs cells from BLZ945- and vehicle-treated mice harvested on day 16 p.i. **J)** CD11c<sup>+</sup> cells in splenocytes from BLZ945- and vehicle-treated mice harvested on day 8 p.i. CD11c<sup>+</sup> cells were isolated by magnetic bead sorting and mixed in a 1:10 ratio with CD4<sup>+</sup> T cells isolated from splenocytes of 2D2 mice, and stimulated with MOG<sub>35-55</sub> for 72 h. Proliferation was then measured by [<sup>3</sup>H]Thymidine incorporation assay. Statistical significance was calculated using two-way unpaired t test. Error bars are S.E.M.

798

799

800

801

802

803

804

805

806

807

808

809

810

811

812

813

814

815

816

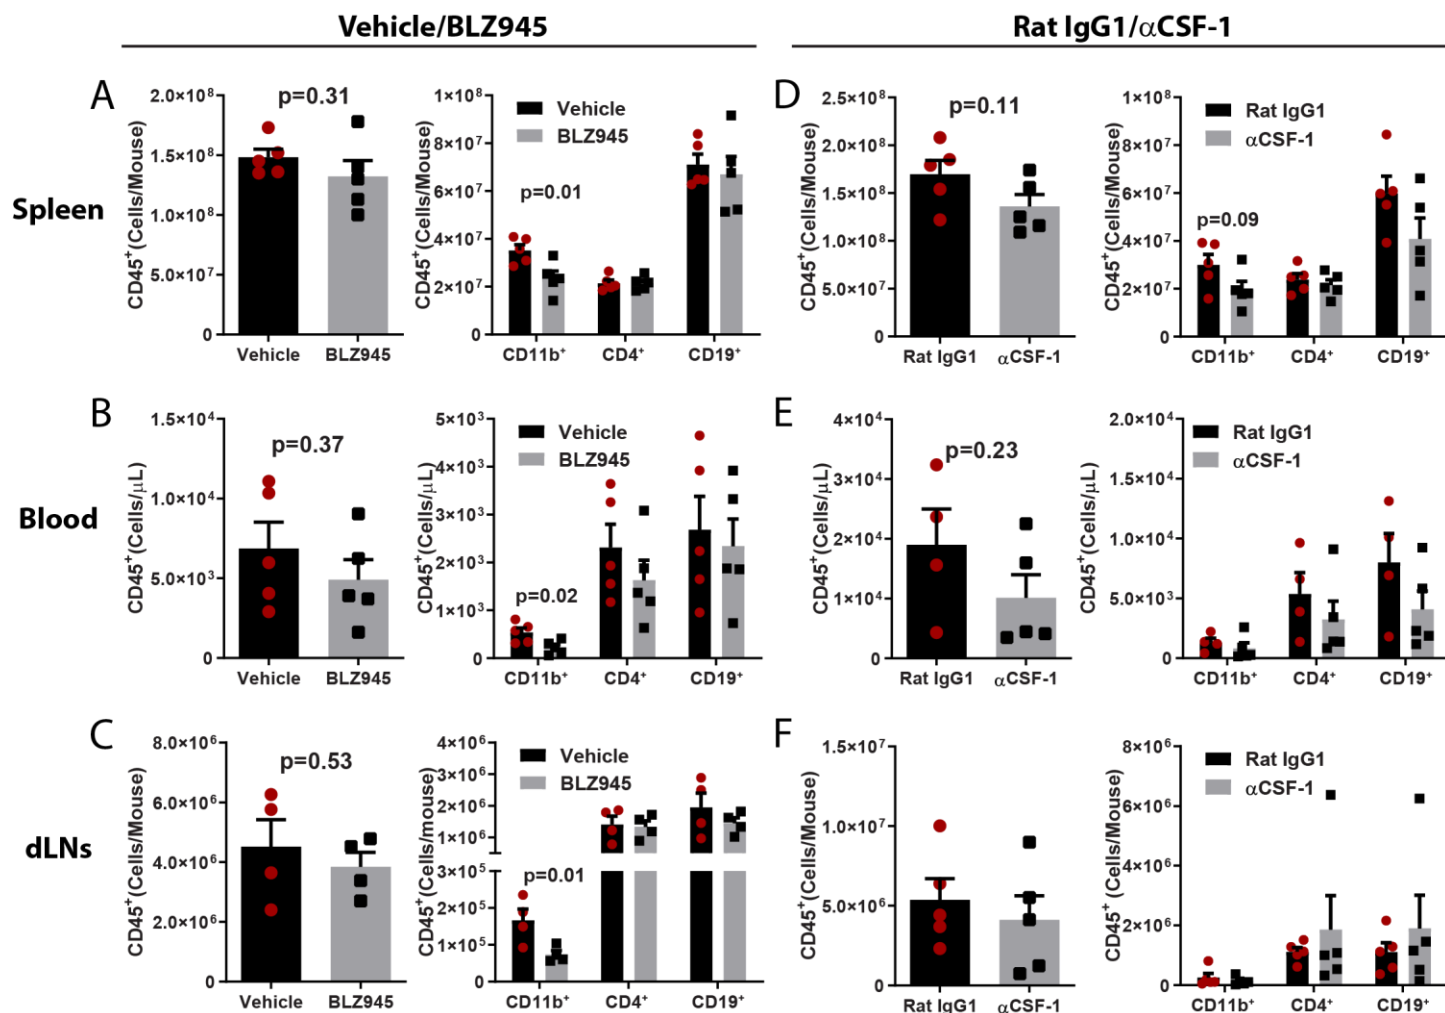

**Supplementary Figure 4: Immune response in peripheral lymphoid organs of BLZ945- and Anti-CSF-1-treated mice on day 8 p.i.** A-C) BLZ945- and vehicle-treated mice (n=5 per group). Number of CD45<sup>+</sup>, CD11b<sup>+</sup>, CD4<sup>+</sup> and CD19<sup>+</sup> cells in A) spleen, B) blood, and C) dLN. E-F) Same quantification as A-C) but for anti-CSF-1- and rat IgG1 control MAbs-treated mice. Statistical significance was calculated using two-way unpaired t test. Error bars are standard S.E.M.

817

818

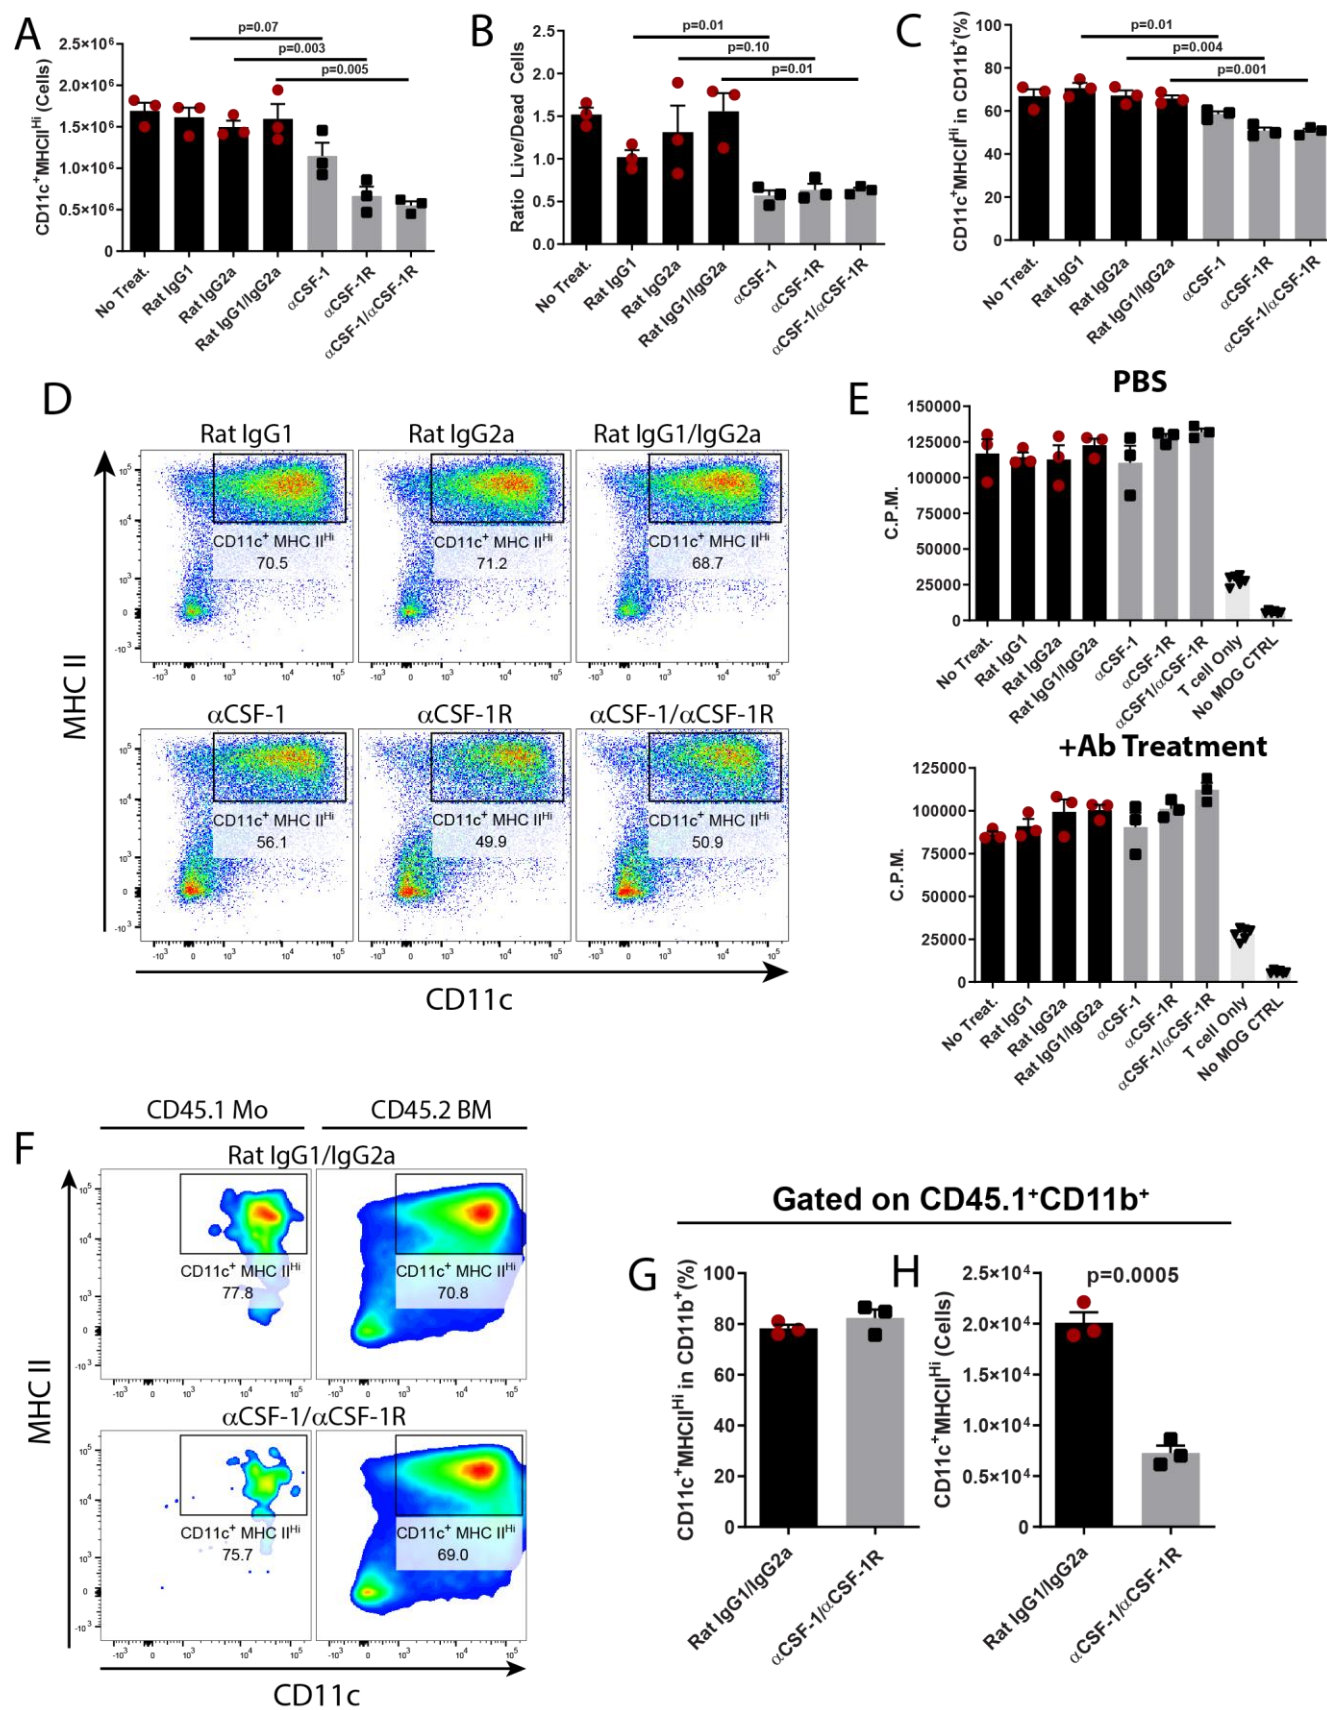

**Figure 6: CSF-1R signaling promotes survival and proliferation of moDCs but not their APC function.** BM cells were cultured in media supplemented with GM-CSF and IL-4 for 7 days in the presence of either control, or anti-CSF1 and anti-CSF-1R MAbs. BMDCs were then matured by stimulation with LPS for 24 h in the presence of the MAbs. **A)** Number of CD11c<sup>+</sup>MHCII<sup>Hi</sup> cells in culture after GM-CSF + IL-4 treatment for 7 days. **B)** Ratio of Live/Dead cells after 24 h LPS treatment. **C-D)** Frequency of CD11c<sup>+</sup>MHCII<sup>Hi</sup> cells after GM-CSF + IL-4 treatment for 7 days. **E)** Co-culture of LPS-matured BMDCs with CD4<sup>+</sup> T cells from 2D2 mice and MOG<sub>35-55</sub> peptide (25 µg/mL). Co-cultures either did or did not contain control and neutralizing MAbs against CSF-1 and CSF-1R. Proliferation was measured using [<sup>3</sup>H]Thymidine incorporation. C.P.M. = counts per minute. **F)** Monocytes were purified from the BM of CD45.1 mice and mixed with total BM of CD45.2 mice, then cultured as described above with control or anti-CSF1/anti-CSF-1R MAbs. Flow cytometry depicting CD11c and MHC II expression in CD45.1<sup>+</sup>CD11b<sup>+</sup> and CD45.2<sup>+</sup>CD11b<sup>+</sup> cells is shown. **G)** Frequency, and **H)** number of CD11c<sup>+</sup>MHC II<sup>Hi</sup> cells among CD45.1<sup>+</sup>CD11b<sup>+</sup> cells. Technical replicates for 1 of 2 independent experiments with similar results are shown. Statistical significance was calculated using two-way unpaired t test. Error bars are S.E.M.

820

821

822

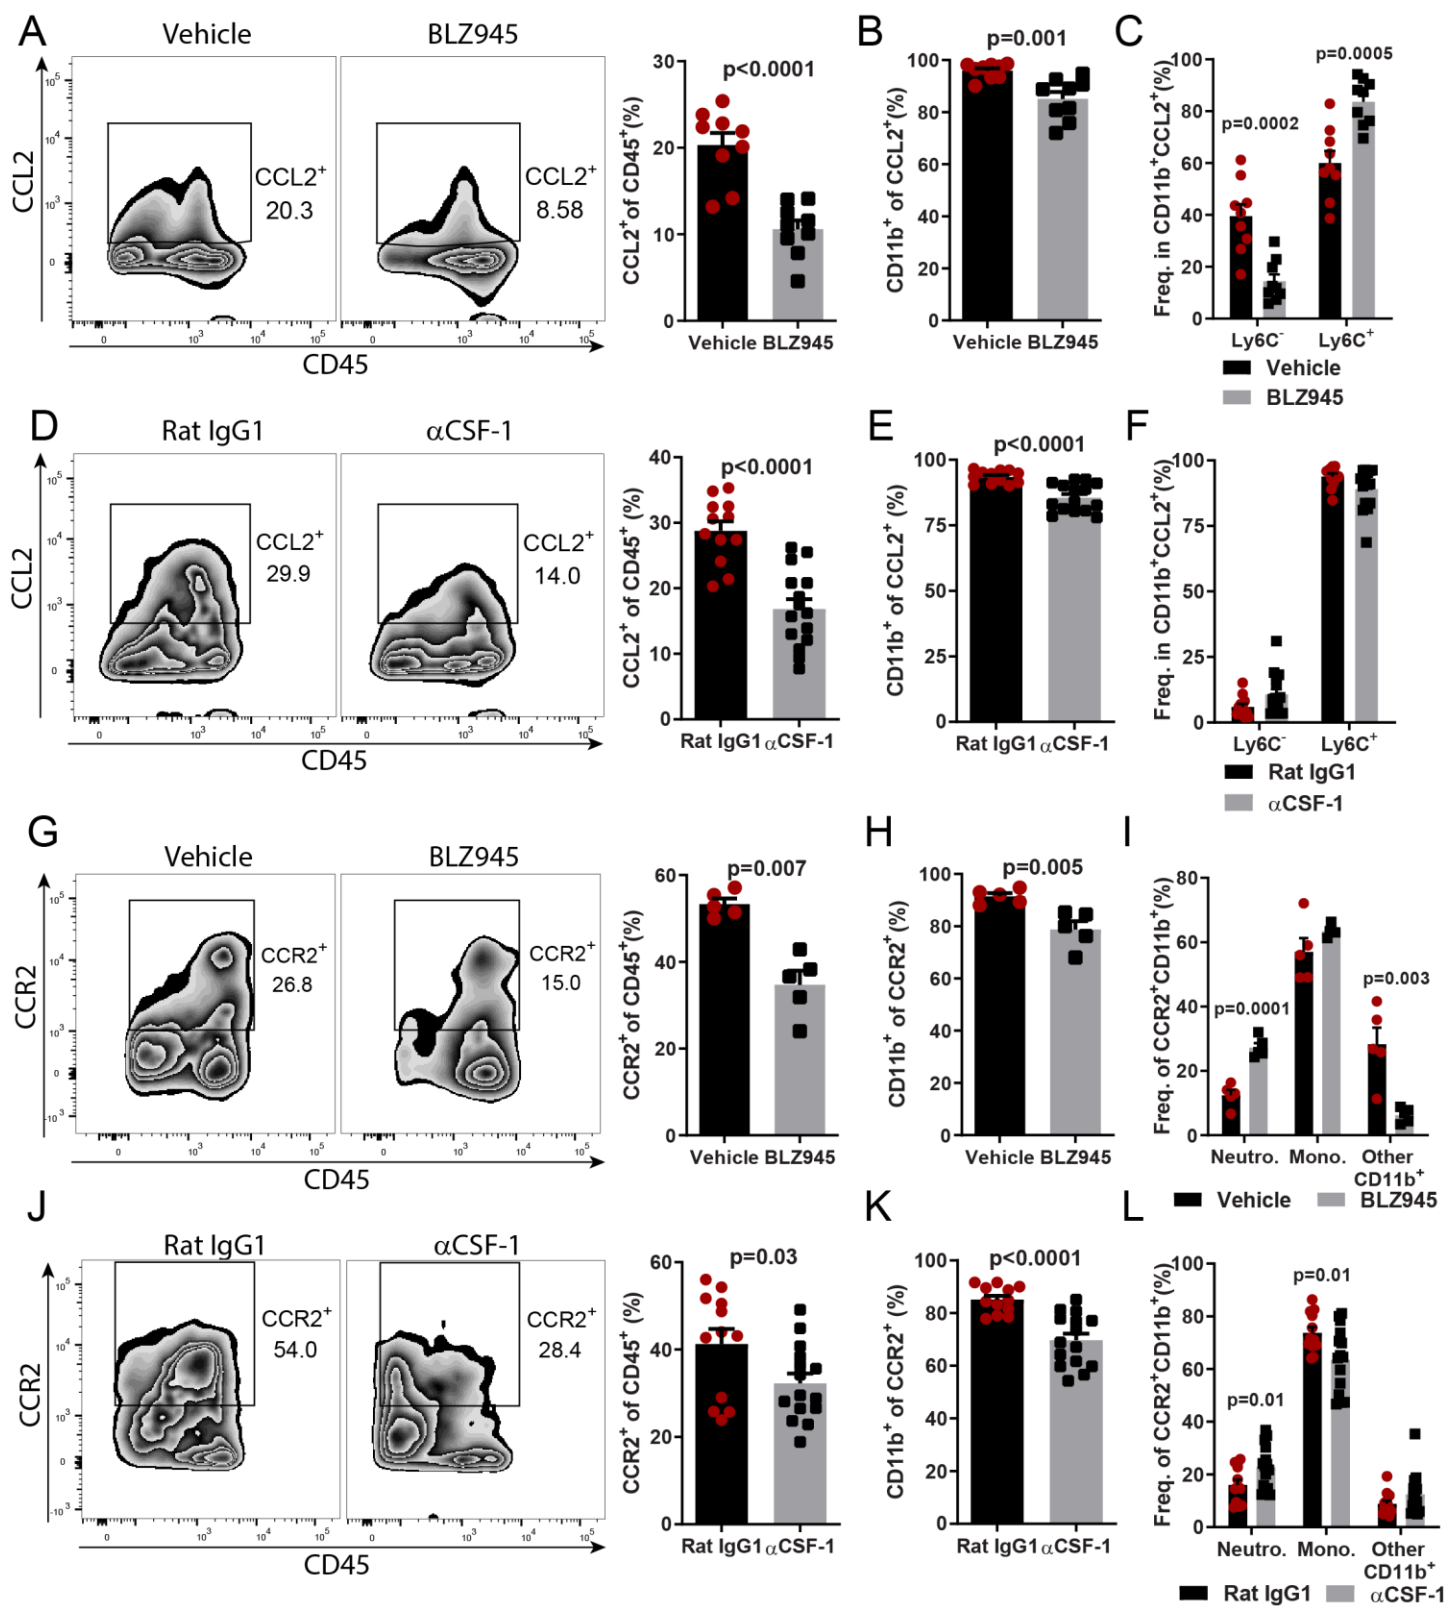

823

824



**Figure 7: Blocking CSF-1R or CSF-1 reduces numbers of CCL2<sup>+</sup> and CCR2<sup>+</sup> myeloid cells in the CNS during EAE.** **A)** Frequency of CCL2<sup>+</sup> cells among CD45<sup>+</sup> cells in the CNS of BLZ945- and vehicle-treated mice (n=9 per group) sacrificed after 6 days of treatment at day 20 p.i.. **B)** CD11b<sup>+</sup> cells among CCL2<sup>+</sup> cells. **C)** Frequency of Ly6C<sup>+</sup> and Ly6C<sup>-</sup> cells among CD11b<sup>+</sup>CCL2<sup>+</sup> cells. **D)** Frequency of CCL2<sup>+</sup> cells among CD45<sup>+</sup> cells from the CNS of anti-CSF-1- and control MAb-treated mice (n=12-15 per group), sacrificed after 6 days of treatment at 17 days p.i.. **E)** CD11b<sup>+</sup> cells among CCL2<sup>+</sup> cells. **F)** Frequency of Ly6C<sup>+</sup> and Ly6C<sup>-</sup> cells among CD11b<sup>+</sup>CCL2<sup>+</sup> cells. **G)** Frequency of CCR2<sup>+</sup> cells among CD45<sup>+</sup> cells from the CNS of BLZ945- and vehicle-treated mice from A). **H)** CD11b<sup>+</sup> cells among CCL2<sup>+</sup> cells. **I)** Frequency of neutrophils (CD45<sup>Hi</sup>CD11b<sup>+</sup>Ly6G<sup>Hi</sup>Ly6C<sup>Int</sup>), monocytes/monocyte-derived cells (CD45<sup>Hi</sup>CD11b<sup>+</sup>Ly6G<sup>Neg/Lo</sup>Ly6C<sup>+</sup>) and other CD11b<sup>+</sup> cells among CCR2<sup>+</sup>CD11b<sup>+</sup> cells. **J)** Frequency of CCR2<sup>+</sup> cells among CD45<sup>+</sup> cells from the CNS of anti-CSF-1- and control MAb-treated mice from D). **K)** CD11b<sup>+</sup> cells among CCL2<sup>+</sup> cells. **L)** Frequency of neutrophils (CD45<sup>Hi</sup>CD11b<sup>+</sup>Ly6G<sup>Hi</sup>Ly6C<sup>Int</sup>), monocytes/monocyte-derived cells (CD45<sup>Hi</sup>CD11b<sup>+</sup>Ly6G<sup>Neg/Lo</sup>Ly6C<sup>+</sup>) and other CD11b<sup>+</sup> cells among CCR2<sup>+</sup>CD11b<sup>+</sup> cells. Statistical significance was calculated using two-tailed unpaired t test. Error bars are S.E.M.

825

826

827

828

829

830

831

832

833

834

835

836

837

838

839

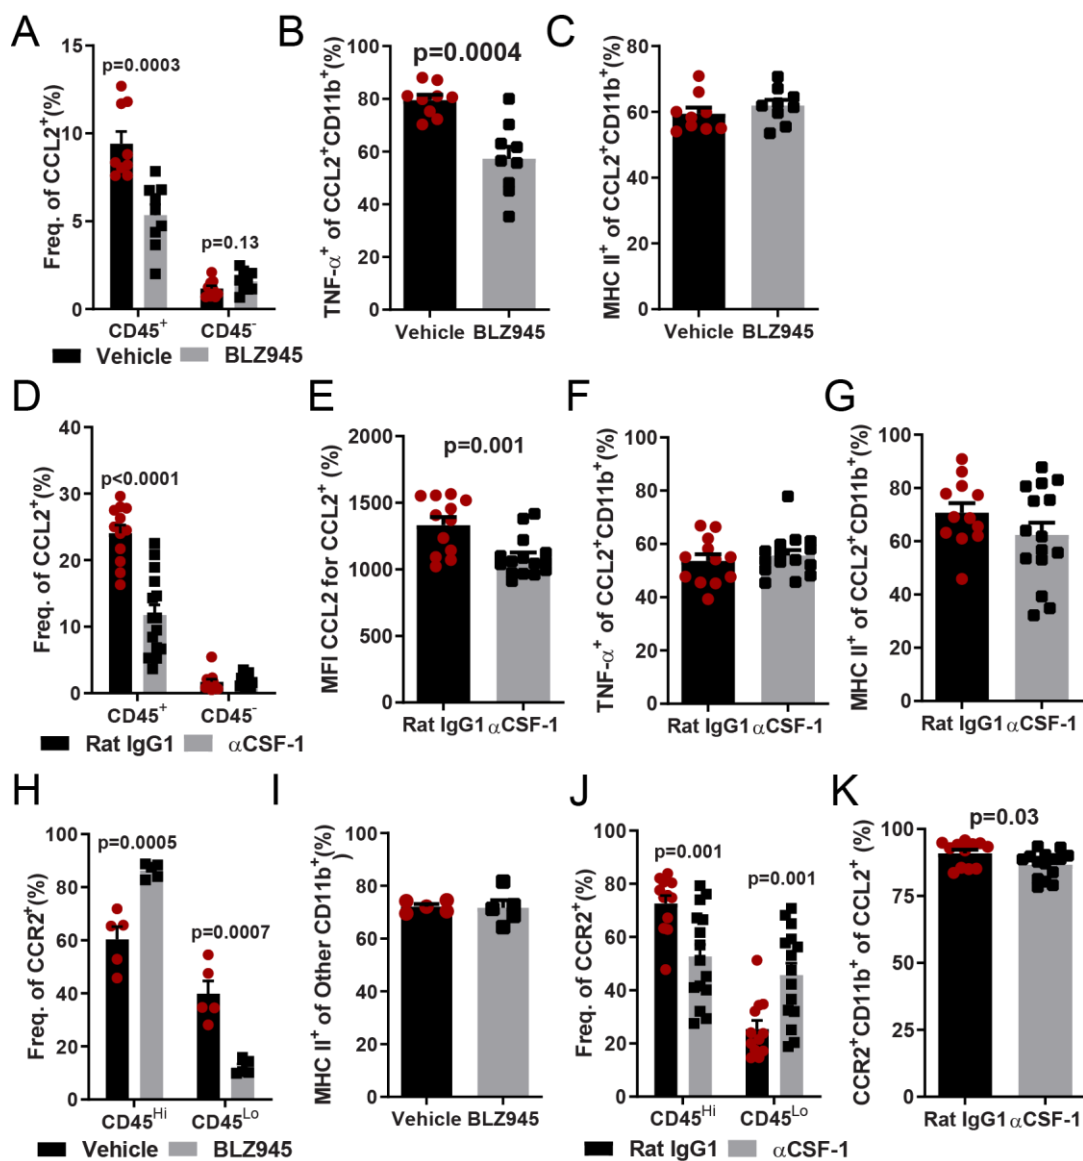

**Supplemental Figure 5. CCL2<sup>+</sup> and CCR2<sup>+</sup> cells are primarily composed of inflammatory myeloid cells.** Frequency of CCL2<sup>+</sup>CD45<sup>+</sup> and CCL2<sup>+</sup>CD45<sup>-</sup> cells among mononuclear cells isolated from the CNS of BLZ945- and vehicle-treated mice with EAE. **B**) Frequency of TNF<sup>+</sup>, and **C**) MHC II<sup>+</sup> cells among CCL2<sup>+</sup>CD11b<sup>+</sup> cells. **D**) Frequency of CCL2<sup>+</sup>CD45<sup>+</sup> and CCL2<sup>+</sup>CD45<sup>-</sup> cells among mononuclear cells isolated from the CNS of anti-CSF-1- and control MAb-treated EAE mice. **E**) MFI of CCL2<sup>+</sup> cells among CD45<sup>+</sup>CCL2<sup>+</sup> cells. **F**) Frequency of TNF<sup>+</sup>, and **G**) MHC II<sup>+</sup> cells among CCL2<sup>+</sup>CD11b<sup>+</sup> cells. **H**) Frequency of CCR2<sup>+</sup> cells among CD45<sup>+</sup> cells that were either CD45<sup>Hi</sup> vs. CD45<sup>Lo</sup> in BLZ945- or vehicle-treated EAE mice. **I**) Percentage of MHC II<sup>+</sup> among “Other CD11b<sup>+</sup> cells” from Fig. 7B. **J**) Frequency of CCR2<sup>+</sup> cells among CD45<sup>+</sup> cells that were either CD45<sup>Hi</sup> vs. CD45<sup>Lo</sup> in anti-CSF-1- or control MAb-treated mice. **K**) Frequency of CCR2<sup>+</sup>CD11b<sup>+</sup> cells among CCL2<sup>+</sup> cells. Statistical significance was calculated with two-tailed unpaired t test. Error bars are S.E.M.

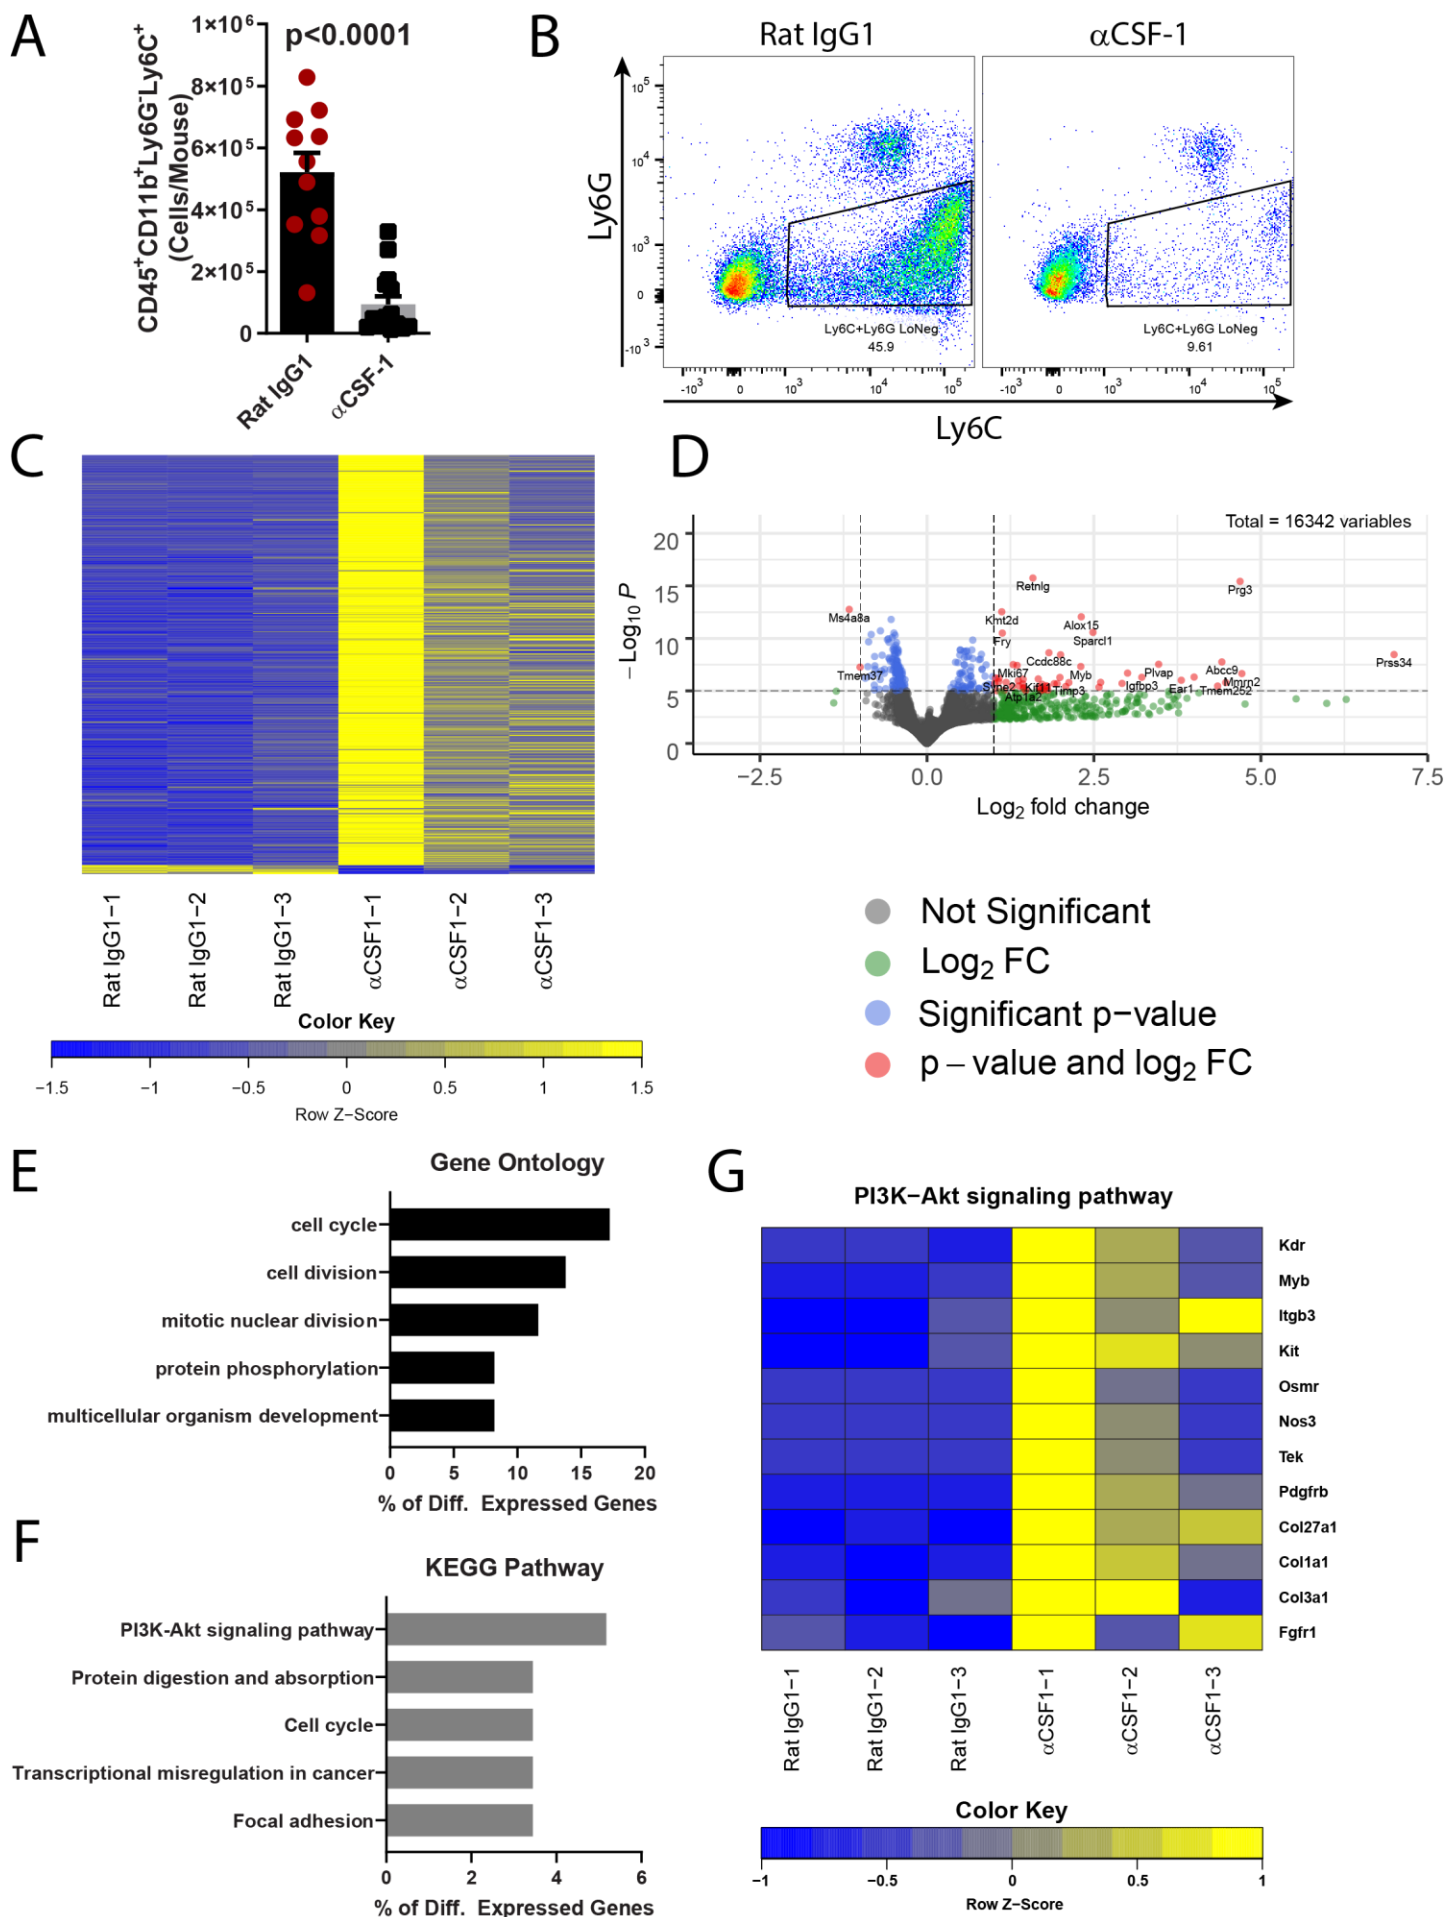

**Figure 8. Monocytes from the CNS of anti-CSF-1 MAb-treated mice with EAE have a transcriptionally distinct phenotype.** EAE was induced in C57BL/6J mice by immunization with MOG<sub>35-55</sub>. Mice were treated with 200 µg/day of anti-CSF-1 MAb or isotype IgG1 control MAb (n=3/group) from day 11 to 16 p.i. and sacrificed on day 17 p.i. **A)** Numbers of CD45<sup>Hi</sup>CD11b<sup>+</sup>Ly6G<sup>-</sup>Ly6C<sup>+</sup> monocytes. **B)** Flow cytometry plots showing expression of Ly6C and Ly6G among CD45<sup>+</sup>CD11b<sup>+</sup> cells. **C)** Heatmap showing differentially expressed transcripts in monocytes from anti-CSF-1- and isotype MAb-treated mice. Criteria for inclusion in heatmap was expression in all samples, with a p-adjusted value < 0.05 and a log<sub>2</sub> fold change greater/less than ±1. **D)** Volcano plot showing relative expression of transcripts detected in samples from anti-CSF-1- and isotype MAb-treated mice. **E)** Gene ontology and **F)** KEGG pathway terms that were significantly enriched (p<0.05) and ranked by percentage of differentially expressed genes (p-adj<0.01). **G)** Heatmap of z-score-normalized TPM data from differentially expressed genes detected from the PI3K-Akt signaling pathway KEGG term.

844

845

846

847

848

849

850

851

852

853

854

855

856

857

858

859

860

861

862

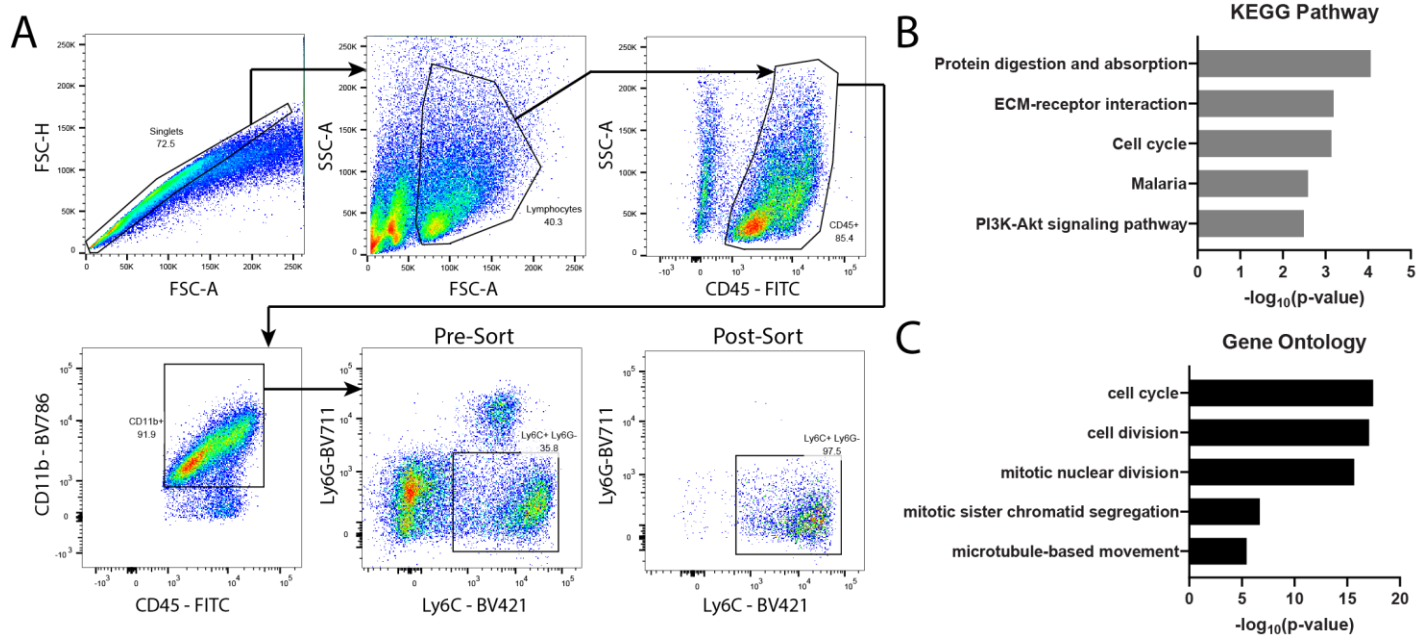

**Supplemental Figure 6. Monocytes from the CNS of mice with EAE treated with anti-CSF-1 MAb have distinct transcriptional profile.** EAE was induced in C57BL/6J mice by immunization with MOG<sub>35-55</sub>. Mice were treated with 200  $\mu\text{g/day}$  of anti-CSF-1 MAb or isotype control MAb from day 11 to 16 p.i. and sacrificed on day 17 p.i. **A)** Gating strategy for FACS sorting of CD45<sup>Hi</sup>CD11b<sup>+</sup>Ly6G<sup>-</sup>Ly6C<sup>+</sup> monocytes/monocyte-derived cells. **B)** Gene ontology and **C)** KEGG pathway terms ranked by significance and generated from differentially expressed genes between monocytes/monocyte derived cells from anti-CSF-1- and isotype control MAb-treated mice.
